# Supplementary material for: A donor–acceptor cage for circularly polarized TADF emission
Source: Royal Society of Chemistry journal article supplement (doi:10.1039/d3cc05136f), 2024-01-01
Supplement: d3cc05136f1.pdf [file d3cc05136f1.pdf]

# Electronic Supplementary Information for

## A donor-acceptor cage for circularly polarized TADF emission

Lihua Chen,<sup>a</sup> Chenfei Li,<sup>a</sup> Zheng-Fei Liu,<sup>d</sup> Yoshiaki Kuboi,<sup>a</sup> Enguang Fu,<sup>a</sup> Lydia Sosa Vargas,<sup>c</sup> Chihaya Adachi,<sup>\*b</sup> Fabrice Mathevet<sup>\*b,c</sup> and Shaodong Zhang<sup>\*a</sup>

<sup>a</sup> School of Chemistry and Chemical Engineering, Shanghai Jiao Tong University, 800 Dongchuan Road, Shanghai 200240, China. E-mail: [sdzhang@sjtu.edu.cn](mailto:sdzhang@sjtu.edu.cn)

<sup>b</sup> Center for Organic Photonics and Electronics Research (OPERA), Kyushu University, 744 Motoooka, Nishi-ku, Fukuoka 819-0395, Japan. E-mail: [adachi@cstf.kyushu-u.ac.jp](mailto:adachi@cstf.kyushu-u.ac.jp); [fabrice.mathevet@sorbonne-universite.fr](mailto:fabrice.mathevet@sorbonne-universite.fr)

<sup>c</sup> Sorbonne Université, CNRS, Institut Parisien de Chimie Moléculaire, IPCM 4 place Jussieu, Paris 75005, France.

<sup>d</sup> Key Laboratory of Radiopharmaceuticals, Ministry of Education, College of Chemistry, Beijing Normal University, Beijing 100875, China.

### Table of Contents

|                                                                   |    |
|-------------------------------------------------------------------|----|
| 1. Materials and Instruments.....                                 | 2  |
| 2. Synthetic Procedures .....                                     | 3  |
| 3. Quantum Chemical Calculations .....                            | 5  |
| 4. Photophysical Experiments .....                                | 9  |
| 5. Chiroptical Properties .....                                   | 12 |
| 6. X-Ray Crystallography .....                                    | 16 |
| 7. NMR and MALDI-TOF MS Spectra of Precursors and Cage DA-2 ..... | 17 |
| 8. References.....                                                | 24 |
| 9. Optimized Geometry of DA-2 .....                               | 26 |

## 1. Materials and Instruments

Reagents and solvents were purchased from commercial suppliers and used without further purification, unless otherwise indicated. The catalyst Pd(PPh<sub>3</sub>)<sub>4</sub> and 2-(hydroxymethyl)phenylboronic acid were purchased from Bide Pharma Ltd., China. Potassium carbonate, cesium carbonate and phosphorus tribromide were purchased from General-Reagent®, China. Flash column chromatography was performed on silica gel (200-300 mesh) and the compounds were visualized under 254 nm on thin-layer chromatography (TLC) plates. Compounds 2,7,12-tribromo-5,10,15-triethyltriindole (**1**) and 4,4',4''-(1,3,5-triazine-2,4,6-triyl)triphenol (**P1**) were synthesized according to the literature procedure.<sup>[S1-S2]</sup>

Nuclear Magnetic Resonance (NMR) spectra were recorded on a Bruker Avance III HD 400, Bruker Avance III HD 500 and Quantum-I Plus 400 spectrometer. Chemical shift values ( $\delta$ ) are reported in ppm relative to the internal reference tetramethylsilane (TMS), and coupling constants ( $J$ ) are reported in Hertz (Hz). The multiplicity in the <sup>1</sup>H NMR spectra are described as s (singlet); d (doublet); t (triplet); q (quartet); m (multiplet). MALDI-TOF mass spectrometry was performed on a Bruker Autoflex speed TOF/TOF mass spectrometer and operated in reflective mode with (trans-2-[3-(4-*tert*-butylphenyl)-2-methyl-2-propene]-malononitrile (DCTB) as the matrix. The single crystal data of cage **DA-2** was collected on Bruker D8 VENTURE at 173 K. The structures were solved by direct methods using the OLEX-2 software. All nonhydrogen atoms were refined using anisotropic thermal parameters.

UV-vis absorption spectra were recorded on a Shimadzu UV 3600 and Perkin-Elmer Lambda 950-PKA spectrometers. The steady state photoluminescence (PL) spectra, and fluorescence lifetimes were measured on a JASCO FP-8600 and an Edinburgh FLS1000 PL spectrometer, as well as on a Hamamatsu Photonics Quantaaurus-Tau C11367-03. The absolute PL quantum efficiencies ( $\Phi$ ) of the samples were measured with a Hamamatsu Photonics Quantaaurus-QY C11347-01. The solutions for the UV-vis and PL measurements were charged in transparent quartz cuvettes with a width of 10 mm and they were degased with O<sub>2</sub> or N<sub>2</sub> during 15 min. The neat film, PMMA film (2 wt%) and host-guest doped films (6 wt%) of **DA-2** were prepared by spin coating from chloroform solutions on quartz substrates with a spin rate of 1000 rpm.

Chiral HPLC was conducted on a Shimadzu LC-20AD device with a CHIRALPAK IG (IG00CE-UC011) column and hexane/DCM/DEA = 30/70/0.1 (V/V/V) as the

mobile phase with a flow rate of 1 mL/min. The column temperature was set at 35 °C. Circular dichroism (CD) was performed with a JASCO J-1500 spectrometer. CD spectra of the solution of **DA-2** were recorded in 10 mm quartz cuvettes at 25 °C using toluene and DCM as the solvent. A scan rate of 200 nm min<sup>-1</sup> with a response time of 1 s and a bandwidth of 5 nm were adopted. CPL spectra were measured on a JASCO CPL-200 spectrophotometer.

## 2. Synthetic Procedures

The syntheses of all chemical compounds are described as follows. <sup>1</sup>H and <sup>13</sup>C NMR resonances of all compounds are listed after their synthetic procedures and their assignments are given in their NMR spectra.

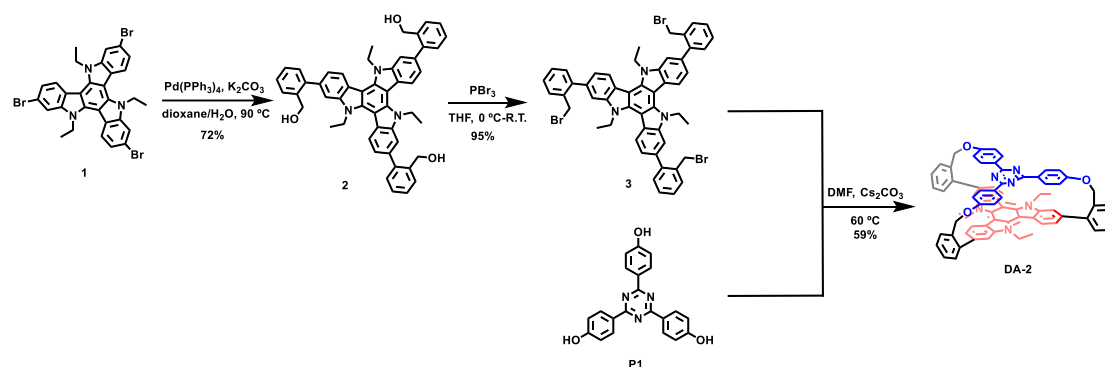

Scheme S1. Synthetic routes for cage **DA-2**.

### Synthesis of compound 2

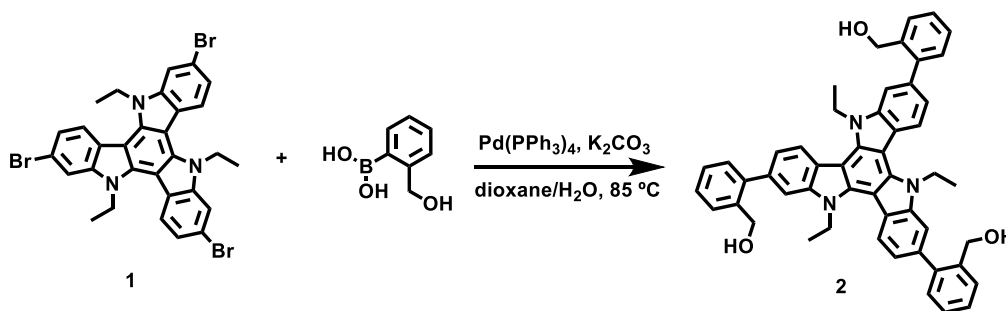

Compound **1** (2664 mg, 4 mmol), 2-(Hydroxymethyl)phenylboronic acid (2432 mg, 16 mmol), Pd(PPh<sub>3</sub>)<sub>4</sub> (462 mg, 0.4 mmol) and K<sub>2</sub>CO<sub>3</sub> (3312 mg, 24 mmol) were added into a schrenk flask which was evacuated and backfilled with N<sub>2</sub> for three times. Dioxane (96 mL) and H<sub>2</sub>O (24 mL) were bubbled with N<sub>2</sub> for 15 minutes and then added into the flask under N<sub>2</sub>. The reaction was kept at 85 °C with stirring for 24 hours. After the reaction, the solvents were removed by rotary evaporation and the residue was extracted with DCM and brine. The organic phase was collected and dried over

anhydrous  $\text{MgSO}_4$  to get the crude product which was purified by column chromatography with EA/PE (1/2) as the eluents to yield the compound **2** (2141 mg, 72%) as yellow powder.  $^1\text{H}$  NMR (400 MHz,  $\text{CDCl}_3$ ):  $\delta$  8.41 (d,  $J = 8.0$  Hz, 3H), 7.69–7.65 (m, 3H), 7.56–7.52 (m, 3H), 7.51–7.46 (m, 6H), 5.11 (q,  $J = 8.0$  Hz, 6H), 4.83 (s, 6H), 1.72 (t,  $J = 8.0$  Hz, 9H).  $^{13}\text{C}$  NMR (125 MHz,  $\text{CDCl}_3$ ):  $\delta$  142.22, 140.83, 139.16, 138.47, 135.58, 130.71, 128.84, 127.90, 127.70, 122.64, 121.35, 121.30, 111.16, 103.23, 63.71, 41.89, 15.82.

### Synthesis of compound **3**

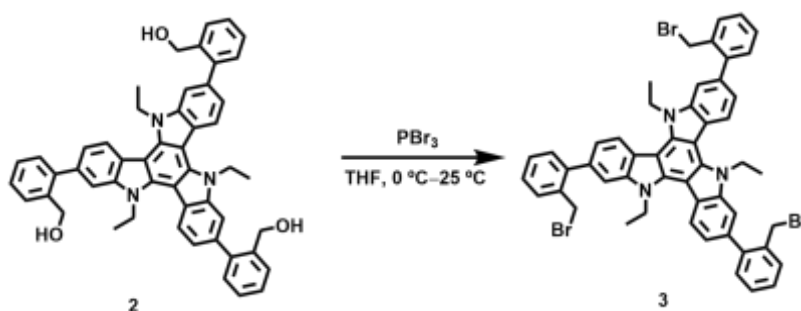

Compound **2** (2141 mg, 2.86 mmol) was charged into a 200 mL Schrenk flask which was evacuated and backfilled with  $\text{N}_2$  for 3 times. Then THF (80 mL) was added by syringe to form a yellow solution. Phosphorus tribromide ( $\text{PBr}_3$ , 1.1 mL, 11.5 mmol) was diluted in THF (5 mL) and added drop by drop into the THF solution of compound **2** under ice bath. Then the reaction was slowly warmed to 25 °C and further reacted for 8 hours with stirring. After the reaction, 2 mL deionized water was added to quench the residual  $\text{PBr}_3$ . THF was removed by rotary evaporation and the residue was dissolved in DCM to get a concentrated solution. Then the solution was added into MeOH drop by drop. The precipitation in MeOH was collected by centrifugation to get the pure product as light-green powder (2341 mg, 87%).  $^1\text{H}$  NMR (400 MHz,  $\text{CDCl}_3$ ):  $\delta$  8.42 (d,  $J = 8.0$  Hz, 3H), 7.90 (d,  $J = 4.0$  Hz, 3H), 7.64–7.61 (m, 3H), 7.52–7.49 (m, 3 H), 7.46–7.41 (m, 9 H), 5.13 (q,  $J = 8.0$  Hz, 6H), 4.65 (s, 6 H), 1.73 (t,  $J = 8$  Hz, 9H).  $^{13}\text{C}$  NMR (125 MHz,  $\text{CDCl}_3$ ):  $\delta$  142.91, 140.72, 139.28, 135.57, 135.07, 131.34, 131.08, 128.77, 127.98, 122.80, 121.48, 121.33, 110.91, 103.26, 42.01, 33.28, 15.96.

## Synthesis of cage DA-2

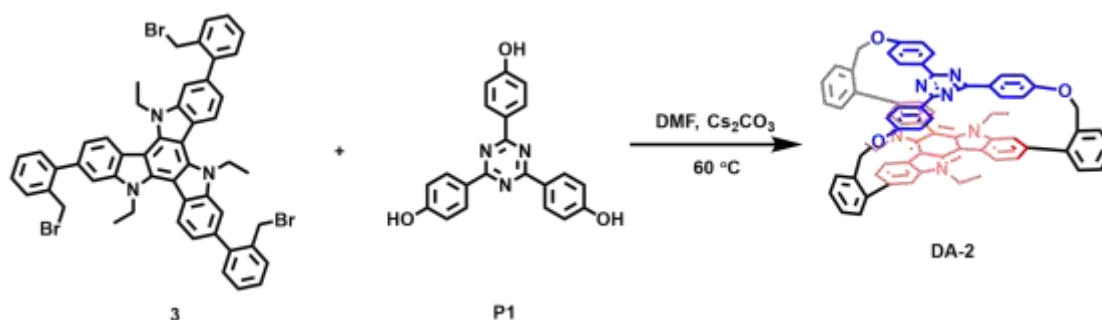

Compound **P1** (229 mg, 0.64 mmol) and cesium carbonate (1252 mg, 3.84 mmol) were dissolved in DMF (256 mL) in a round flask. The reaction mixture was stirred at 60 °C for 0.5 hour. Then the powder of compound **3** (600 mg, 0.64 mmol) was added into the solution and the mixture was reacted for further 24 hours. After the reaction, the mixture was extracted with DCM and brine. The organic phase was washed with brine for 3 times and then dried over anhydrous Na<sub>2</sub>SO<sub>4</sub>. The concentrated DCM solution was added into MeOH and the precipitate was collected by centrifugation to get the crude product. Pure product **DA-2** (400 mg, 59%) was obtained by column chromatography with DCM/PE 2/1 as the eluents. <sup>1</sup>H NMR (400 MHz, CDCl<sub>3</sub>): δ 8.25–8.01 (m, 9H), 7.58–7.42 (m, 12H), 7.14–7.00 (m, 6H), 6.75 (d, *J* = 4.0 Hz, 4 H), 6.43–6.13 (m, 4 H), 5.22–5.00 (m, 6H), 4.65 (s, 3 H), 1.99 (s, 9H). <sup>13</sup>C NMR (125 MHz, CDCl<sub>3</sub>): δ 168.95, 163.48, 144.41, 139.75, 138.46, 136.40, 135.51, 131.42, 130.80, 130.25, 128.97, 128.60, 127.97, 127.67, 121.84, 121.09, 120.63, 119.24, 118.20, 112.75, 111.80, 101.48, 71.34, 41.00, 17.41. MALDI-TOF: Calcd. for C<sub>72</sub>H<sub>54</sub>N<sub>6</sub>O<sub>3</sub> [M]<sup>+</sup> 1050.425; Found, 1050.289.

### 3. Quantum Chemical Calculations

All calculations have been performed with the Gaussian09 A.02 program<sup>[S3]</sup> using default procedures, algorithms and integration grids. The initial structure obtained from single crystal analysis was optimized with the range-separated dispersion-corrected hybrid functional ωB97X-D<sup>[S4]</sup> in conjunction with the 6-31G(d,p) basis level since it includes a dispersion correction for efficient description of weak interactions.<sup>[S5]</sup> In order to maintain consistency with UV-Vis absorption and CD experiments, ground state and excited state optimizations were carried out using dichloromethane ( $\epsilon = 8.93$ ) as the solvent within the framework of the Conductor-like Polarizable Continuum Model (CPCM). Concurrently, time-dependent DFT (TD-DFT) calculations of the

excited state properties were conducted utilizing toluene ( $\epsilon = 2.37$ , CPCM) as the solvent, in accordance with time-resolved and temperature-dependent photophysical studies.<sup>[S6]</sup> Calculated frontier orbitals (two HOMO and two LUMO because the molecule was found of  $C_3$  symmetry) of **DA-2** are displayed in Fig. S1 (Please note that the ethyl groups have been replaced with methyl groups in order to alleviate the computational workload). Frequency calculation was performed with no imaginary frequency found for the optimized molecular geometry.

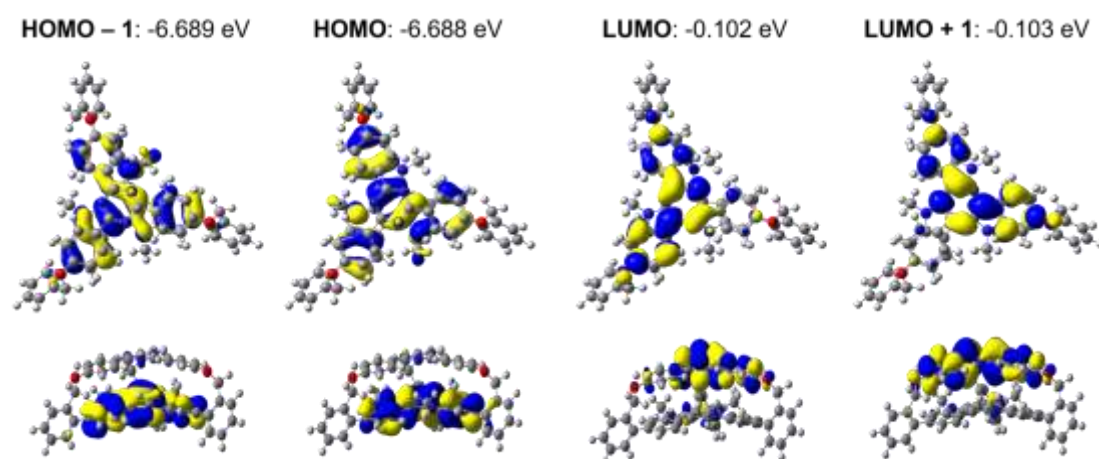

**Fig. S1** Calculated frontier orbitals of **DA-2**.

TD-DFT calculations were performed using optimized molecular geometry for the first 20 (singlet:triplet = 50:50) transitions considering toluene as solvent (CPCM). Specifically, TD-DFT calculations were performed under B3LYP/6-311G(d,p) level<sup>[S7]</sup> in combination with the Becke-Jonson (BJ) damping (-D3(BJ)) which includes an intramolecular non-covalent interactions correction<sup>[S8]</sup> with an additional keyword of IOP(9/40=4).

**Table S1.** Calculated energy level for **DA-2** model compound.

| HOMO -1<br>(eV) | HOMO<br>(eV) | LUMO<br>(eV) | LUMO +1<br>(eV) | S <sub>1</sub><br>(eV) | T <sub>1</sub><br>(eV) | $\Delta E_{ST}$<br>(eV) | OS S <sub>1</sub><br>(f) |
|-----------------|--------------|--------------|-----------------|------------------------|------------------------|-------------------------|--------------------------|
| -6.689          | -6.688       | -0.102       | -0.103          | 2.757                  | 2.624                  | 0.133                   | 0.0018                   |

**Table S2.** The contribution of the molecular orbitals (MOs) of the transition from ground ( $S_0$ ) to excited singlet ( $S_1$  and  $T_1$ ) for **DA-2** model compound.

| Transition | OS ( $f$ ) | Major contributions |          |            |           | $\lambda$<br>(nm) |
|------------|------------|---------------------|----------|------------|-----------|-------------------|
| $S_1$      | 0.0018     | H-1->LUMO           | H-1->L+1 | HOMO->LUMO | HOMO->L+1 | 449.74            |
|            |            | (20%)               | (23%)    | (34%)      | (22%)     |                   |
| $T_1$      | 0.0000     | H-1->LUMO           | H-1->L+1 | HOMO->LUMO | HOMO->L+1 | 472.52            |
|            |            | (22%)               | (14%)    | (16%)      | (22%)     |                   |

Excited state geometry optimization were performed under CAM-B3LYP<sup>[S9]</sup>/6-311G(d,p) level in combination with the Becke-Jonson (BJ) damping (-D3(BJ)) which includes an intramolecular non-covalent interactions correction with an additional keyword of IOP(9/40 = 4) considering DCM as solvent (CPCM). Hole/electron analysis, transition dipole moment analysis and magnetic transition dipole moment analysis were done by Multiwfn Ver 3.8. <sup>[S10]</sup>

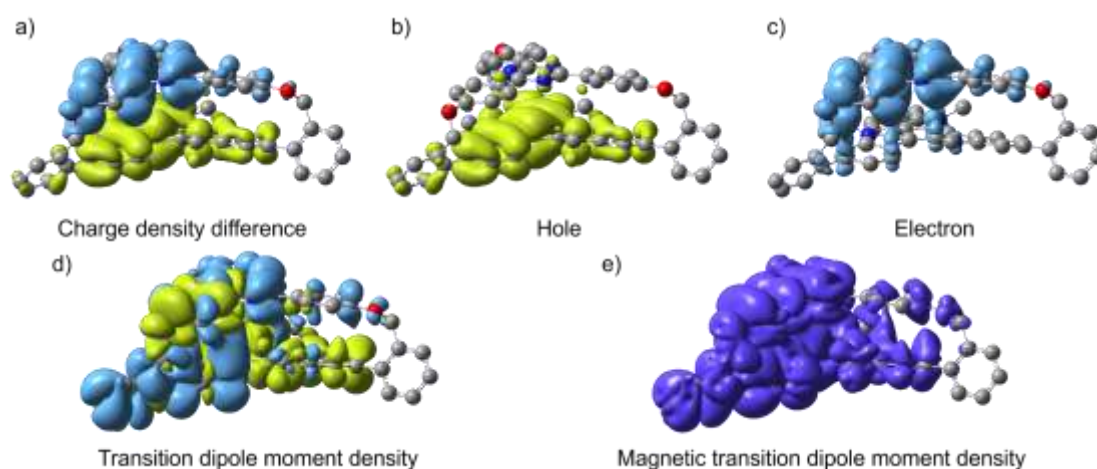

**Fig. S2** Excited state analysis of optimized  $S_1$  geometry for **DA-2** with isovalue = 0.0004, (a) charge density difference analysis and  $S_1$  transition; (b) and (c) hole/electron analysis of  $S_1$  state; (d) and (e) electronic and magnetic transition dipole moment analysis of  $S_1$  state.

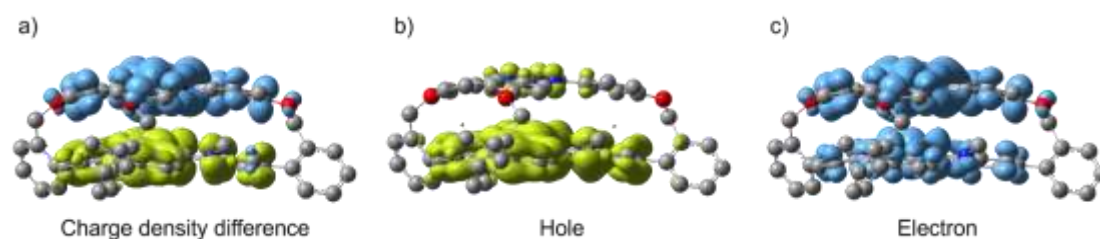

**Fig. S3** (a) Charge density difference analysis and  $T_1$  transition; (b) and (c) hole/electron analysis of  $T_1$  state

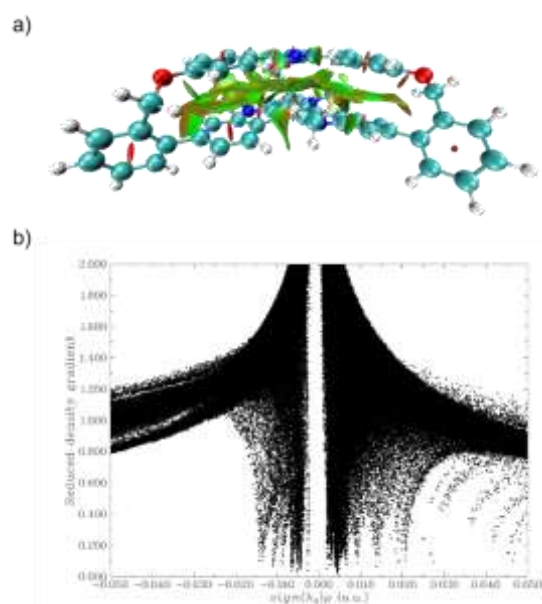

**Fig. S4** (a) Reduced density gradient (RDG) isosurface map (isovalue = 0.50) and (b) corresponding scatter diagram (plots of RDG to  $\text{sign}(\lambda_2)\rho$ ) for **DA-2**.

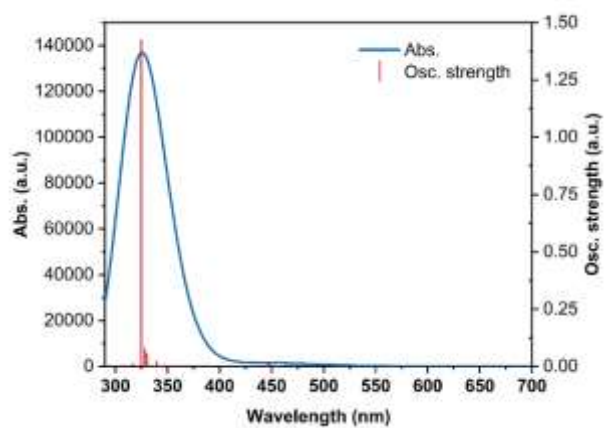

**Fig. S5** Predicted UV-Vis absorption spectrum and oscillator strength of major transitions.

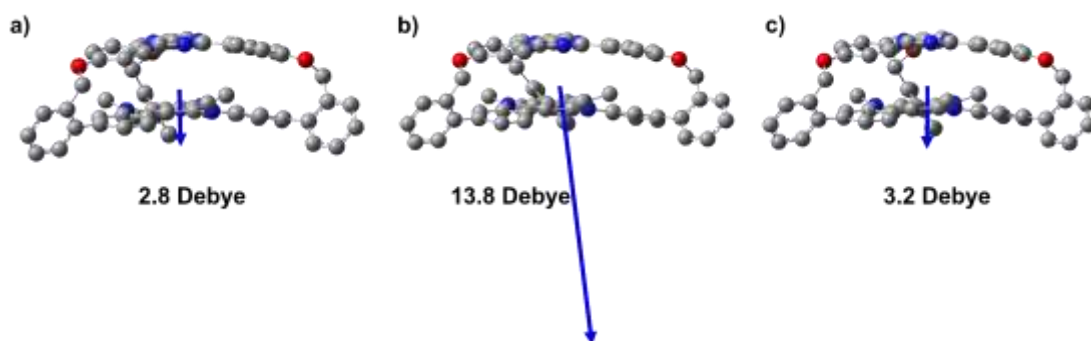

**Fig. S6** Dipole moments of (a) ground state, (b)  $S_1$  excited state and (c)  $T_1$  excited state.



## 4. Photophysical Experiments

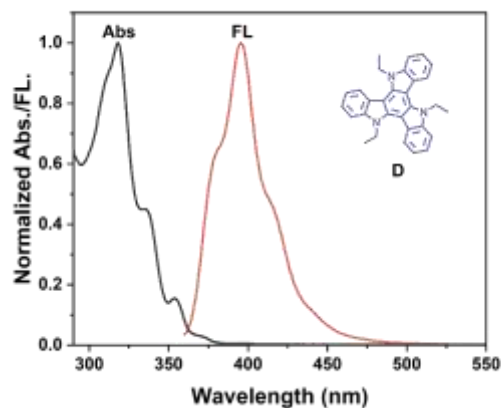

Fig. S7 Absorption and fluorescence spectra of reference electron donor **D** in toluene solution.

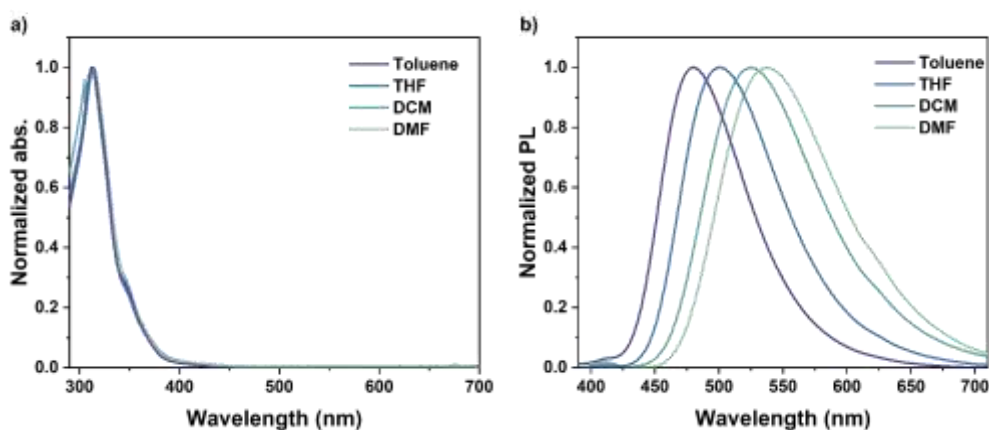

Fig. S8 Absorption (a) and photoluminescence (Excitation wavelength: 310 nm) (b) spectra of DA-2 in different solvents.

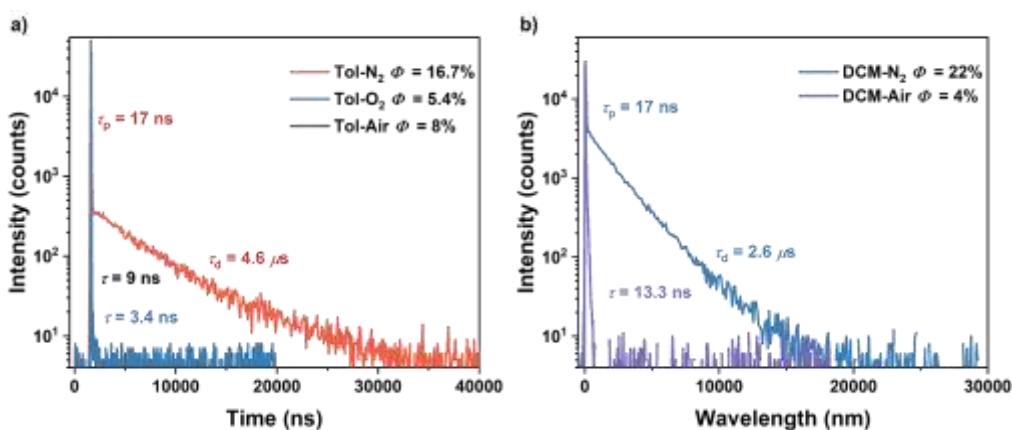

Fig. S9 Time resolved PL of DA-2 in toluene (a) and DCM (b) solution at 298 K. (Excitation wavelength: 340 nm)

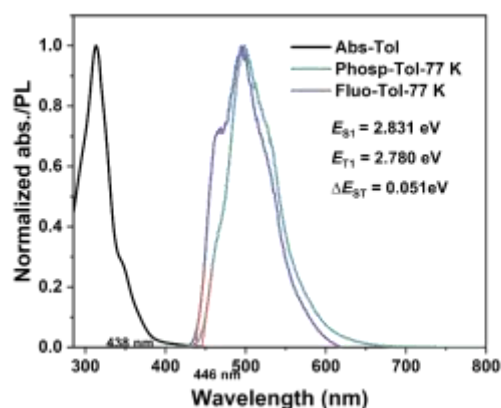

**Fig. S10** Absorption, fluorescence and phosphorescence spectra of **DA-2** in toluene solution. The energy levels of  $S_1$  and  $T_1$  excited states were calculated from the onset of fluorescence and phosphorescence spectra.

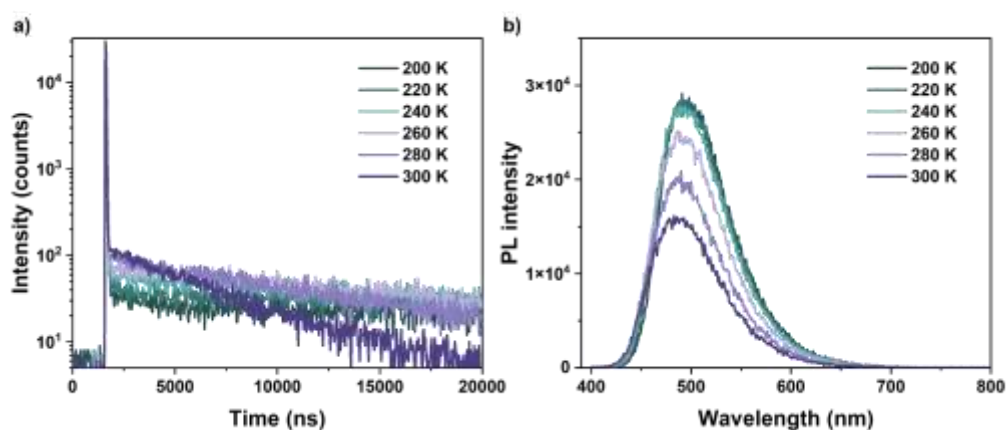

**Fig. S11** mperature dependence of time resolved PL in toluene (a) and the corresponding PL spectra at each temperature (b).

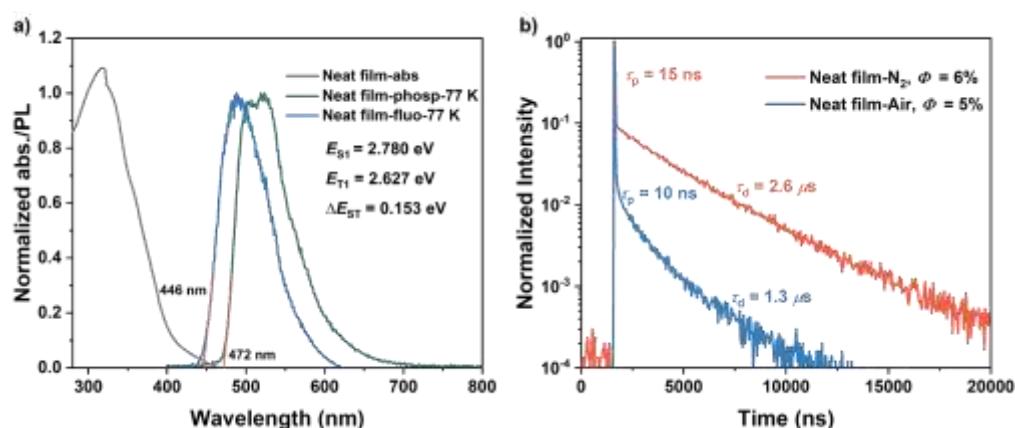

**Fig. S12** (a) Solid-state absorption (298 K), fluorescence and phosphorescence (77 K) spectra of **DA-2** in neat film. The energy difference of  $S_1$  and  $T_1$  excited states were calculated as 0.015 eV from the onset of fluorescence and phosphorescence spectra. (b) The time resolved PL spectra at 298 K in  $N_2$  and air condition.

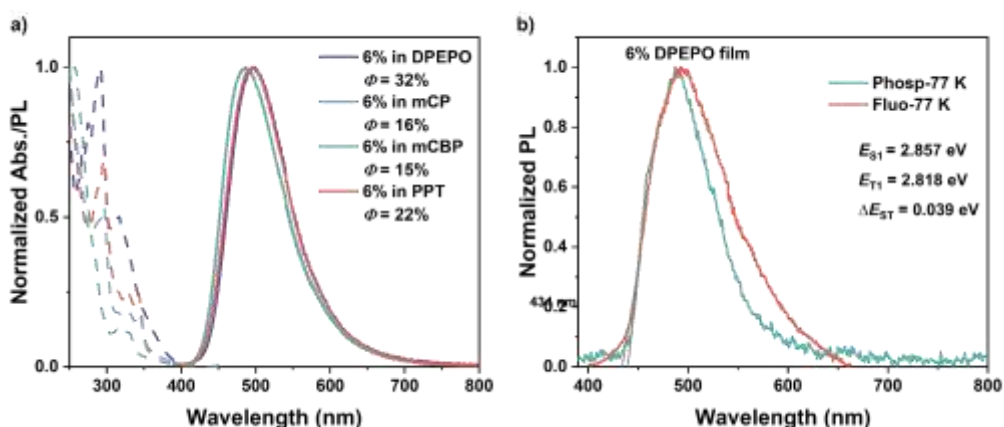

**Fig. S13** Solid-state absorption and photoluminescence of **DA-2** doped in different host materials (a) and the fluorescence and phosphorescence spectra of **DA-2** in neat film at 77 K (b). The energy levels of  $S_1$  and  $T_1$  excited states were calculated from the onset of fluorescence and phosphorescence spectra.

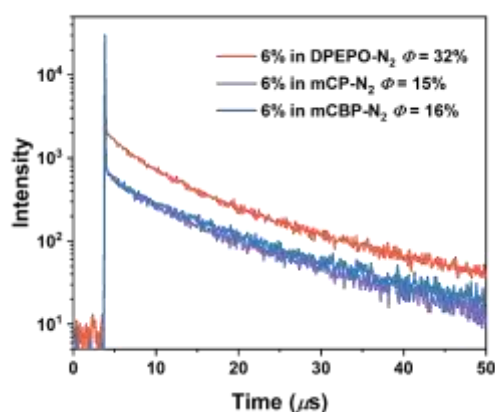

**Fig. S14** Time resolved PL of **DA-2** in different host materials (6 wt%). In DPEPO host matrix, the proportion of delayed component was obviously increased which is consistent with the increase of PLQY.

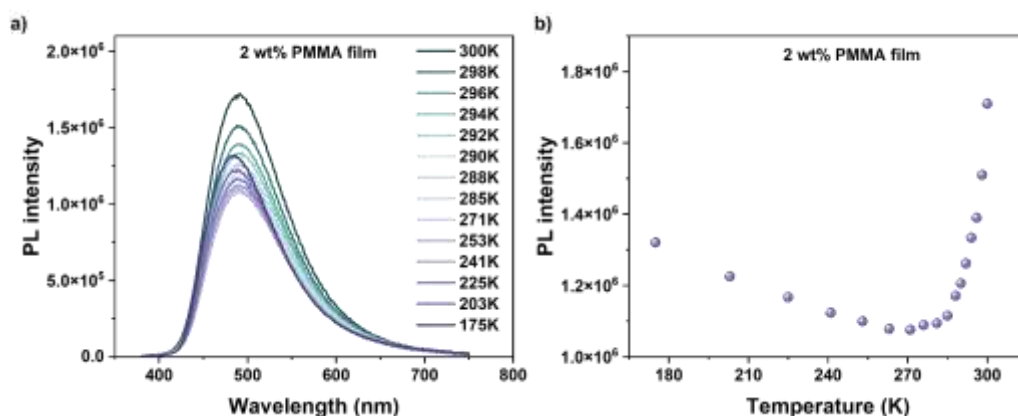

**Fig. S15** Temperature-dependence of PL spectra of **DA-2** in 2 wt% doped PMMA film.

**Table S3.** Summary of photophysical properties of **DA-2** in different conditions.

|                             | Tol            |     |                | DCM            |     | Neat | PMMA | DPEPO | PPT  | mCP  | mCBP |
|-----------------------------|----------------|-----|----------------|----------------|-----|------|------|-------|------|------|------|
|                             |                |     |                |                |     | film | film | film  | film | film | film |
| $\lambda_{\max}$<br>(nm)    | 485            |     |                | 520            |     | 490  | 480  | 495   | 495  | 485  | 485  |
| $\Phi_{\text{PLQY}}$<br>(%) | N <sub>2</sub> | Air | O <sub>2</sub> | N <sub>2</sub> | Air | 6    | 20   | 32    | 22   | 15   | 16   |
|                             |                |     |                |                |     |      |      |       |      |      |      |

## 5. Chiroptical Properties

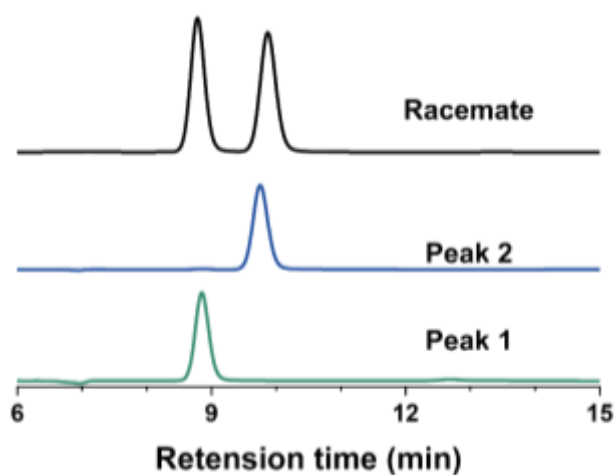

**Fig. S16** Chiral HPLC results of compound **DA-2**.

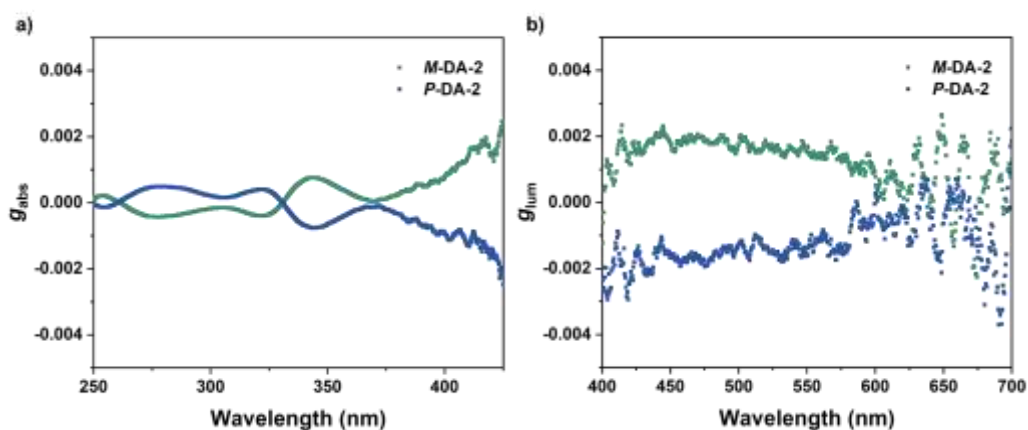

**Fig. S17** Experimental  $g$  factors of absorption in DCM solution (a) and luminescence in PMMA film (b) of **DA-2** enantiomers.

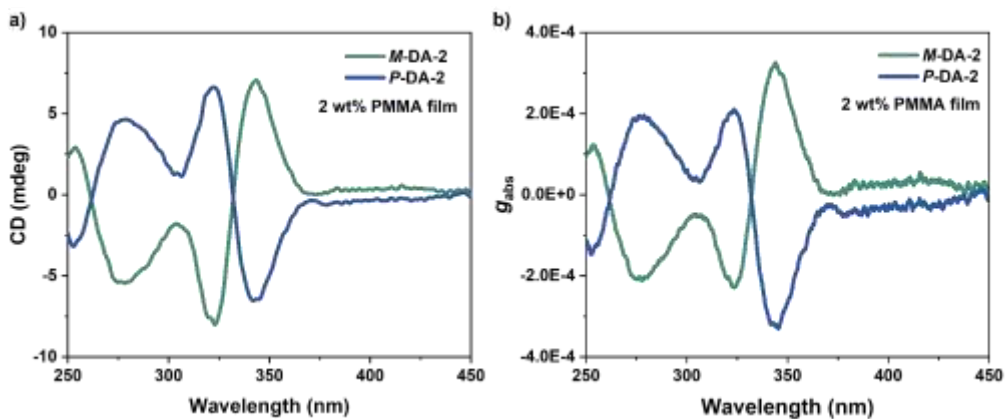

**Fig. S18** CD spectrum (a) and the corresponding  $g$  factor (b) of DA-2 enantiomers in 2 wt% doped PMMA film.

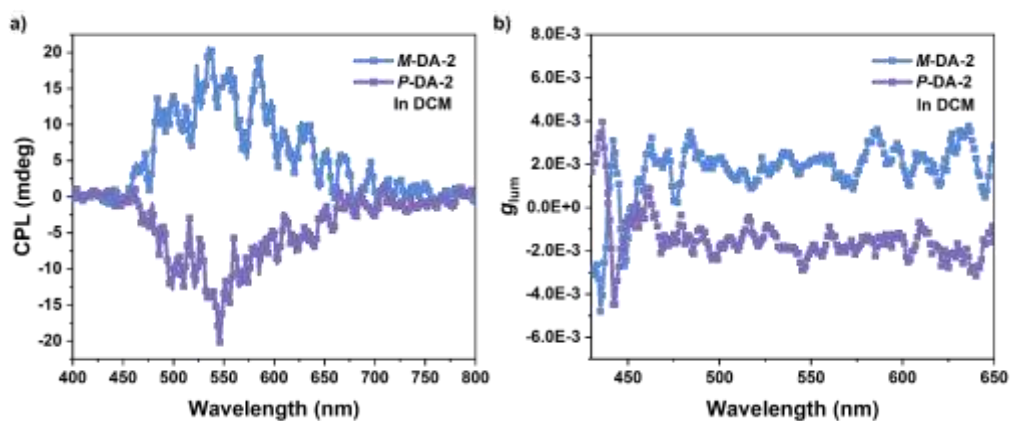

**Fig. S19** CPL spectrum (a) and the corresponding  $g$  factor (b) of DA-2 enantiomers in DCM solution.

Sample Information

Acquired by : System Administrator  
 Sample Name : DA-2-PK1--DCM-Hex-60-40  
 Sample ID :  
 Tray# : 1  
 Vial# : 77  
 Injection Volume : 20  
 Data File : DA-2-PK1--DCM-Hex-60-41.lcd  
 Method File : Method-20211124.lcm  
 Batch File :  
 Report Format File : DEFAULT.lsr  
 Date Acquired : 12/12/2023 6:35:48 PM  
 Date Processed : 12/12/2023 7:35:51 PM

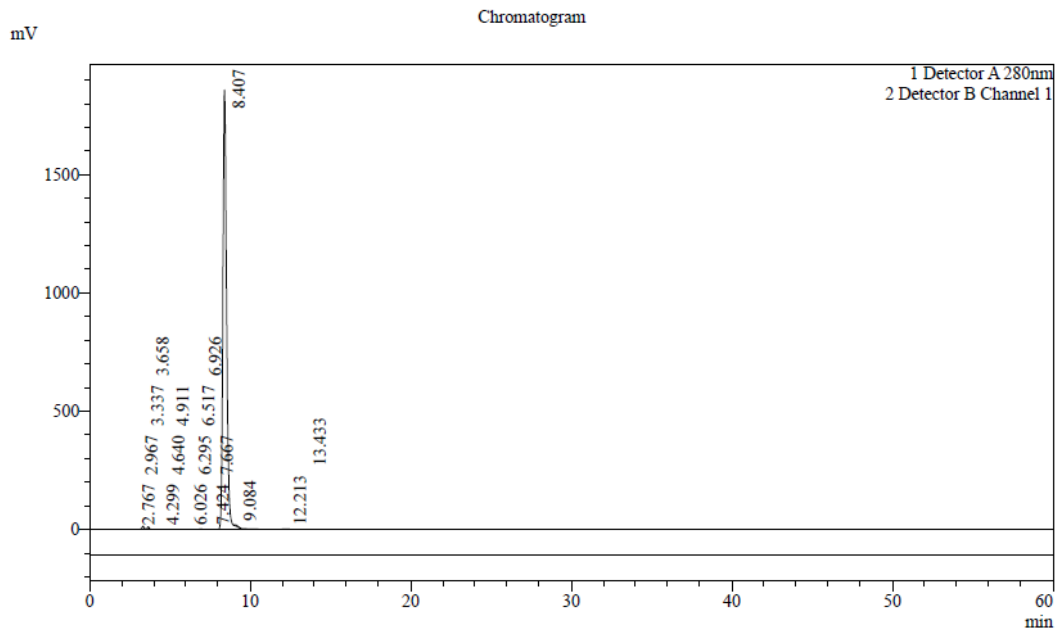

Peak Table

| Detector A 280nm |           |          |         |         |         |
|------------------|-----------|----------|---------|---------|---------|
| Peak#            | Ret. Time | Area     | Height  | Area%   | Height% |
| 1                | 2.767     | 1768     | 78      | 0.006   | 0.004   |
| 2                | 2.967     | 1115     | 99      | 0.004   | 0.005   |
| 3                | 3.337     | 127297   | 13631   | 0.423   | 0.720   |
| 4                | 3.658     | 95426    | 11493   | 0.317   | 0.607   |
| 5                | 4.299     | 10526    | 677     | 0.035   | 0.036   |
| 6                | 4.640     | 4068     | 283     | 0.014   | 0.015   |
| 7                | 4.911     | 1363     | 137     | 0.005   | 0.007   |
| 8                | 6.026     | 3107     | 285     | 0.010   | 0.015   |
| 9                | 6.295     | 2641     | 196     | 0.009   | 0.010   |
| 10               | 6.517     | 1104     | 145     | 0.004   | 0.008   |
| 11               | 6.926     | 21635    | 1330    | 0.072   | 0.070   |
| 12               | 7.424     | 6980     | 427     | 0.023   | 0.023   |
| 13               | 7.667     | 5329     | 332     | 0.018   | 0.018   |
| 14               | 8.407     | 29692116 | 1858709 | 98.746  | 98.208  |
| 15               | 9.084     | 52690    | 3835    | 0.175   | 0.203   |
| 16               | 12.213    | 31559    | 587     | 0.105   | 0.031   |
| 17               | 13.433    | 10546    | 383     | 0.035   | 0.020   |
| Total            |           | 30069270 | 1892628 | 100.000 | 100.000 |

**Fig. S20** HPLC diagram of the one enantiomer of DA-2.

Acquired by : System Administrator  
 Sample Name : DA-2-PK2--DCM-Hex-60-40  
 Sample ID :  
 Tray# : 1  
 Vial# : 76  
 Injection Volume : 20  
 Data File : DA-2-PK2--DCM-Hex-60-41.lcd  
 Method File : Method-20211124.lcm  
 Batch File :  
 Report Format File : DEFAULT.lsr  
 Date Acquired : 12/12/2023 4:26:25 PM  
 Date Processed : 12/12/2023 4:57:37 PM

Sample Information

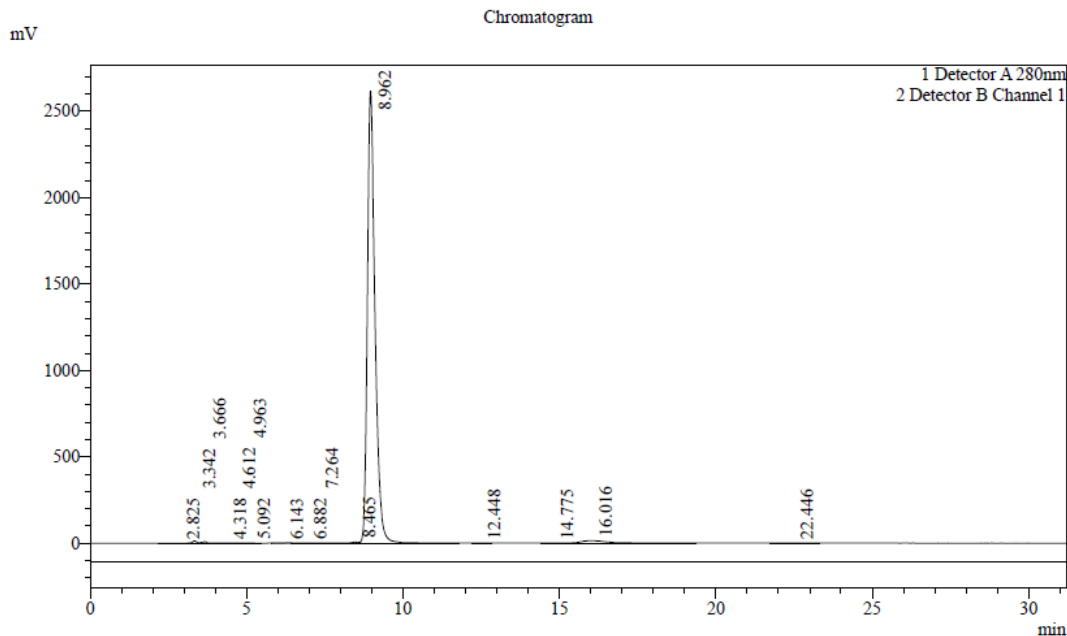

Peak Table

| Peak# | Ret. Time | Area     | Height  | Area%   | Height% |
|-------|-----------|----------|---------|---------|---------|
| 1     | 2.825     | 3701     | 110     | 0.008   | 0.004   |
| 2     | 3.342     | 134958   | 13664   | 0.296   | 0.513   |
| 3     | 3.666     | 82686    | 9531    | 0.181   | 0.358   |
| 4     | 4.318     | 11498    | 859     | 0.025   | 0.032   |
| 5     | 4.612     | 5903     | 349     | 0.013   | 0.013   |
| 6     | 4.963     | 1623     | 167     | 0.004   | 0.006   |
| 7     | 5.092     | 1665     | 145     | 0.004   | 0.005   |
| 8     | 6.143     | 3321     | 210     | 0.007   | 0.008   |
| 9     | 6.882     | 7409     | 445     | 0.016   | 0.017   |
| 10    | 7.264     | 15638    | 957     | 0.034   | 0.036   |
| 11    | 8.465     | 88363    | 6355    | 0.194   | 0.238   |
| 12    | 8.962     | 44360945 | 2616392 | 97.224  | 98.186  |
| 13    | 12.448    | 2142     | 121     | 0.005   | 0.005   |
| 14    | 14.775    | 1775     | 72      | 0.004   | 0.003   |
| 15    | 16.016    | 889486   | 14985   | 1.949   | 0.562   |
| 16    | 22.446    | 16340    | 382     | 0.036   | 0.014   |
| Total |           | 45627452 | 2664744 | 100.000 | 100.000 |

Fig. S21 HPLC diagram of the other enantiomer of DA-2.

## 6. X-Ray Crystallography

CCDC deposition number 2308211.

**Table S4.** Crystal data and structure refinement for **DA-2 • CHCl<sub>3</sub>**.

|                                   |                                                                                                                                                         |
|-----------------------------------|---------------------------------------------------------------------------------------------------------------------------------------------------------|
| Identification code               | <b>DA-2 • CHCl<sub>3</sub></b>                                                                                                                          |
| Empirical formula                 | C <sub>73</sub> H <sub>55</sub> Cl <sub>3</sub> N <sub>6</sub> O <sub>3</sub>                                                                           |
| Formula weight                    | 1170.58                                                                                                                                                 |
| Temperature                       | 173 K                                                                                                                                                   |
| Wavelength                        | 1.54178 Å                                                                                                                                               |
| Crystal system, space group       | Orthorhombic, <i>Pca</i> 2 <sub>1</sub>                                                                                                                 |
| Unit cell dimensions              | $a = 24.6915 (5) \text{ \AA}, \alpha = 90^\circ$<br>$b = 14.7339 (3) \text{ \AA}, \beta = 90^\circ$<br>$c = 15.6091 (3) \text{ \AA}, \gamma = 90^\circ$ |
| Volume                            | 5678.6 (2)                                                                                                                                              |
| Z, Calculated density             | 4, 1.369 g/cm <sup>3</sup>                                                                                                                              |
| Absorption coefficient            | 1.921 mm <sup>-1</sup>                                                                                                                                  |
| F (000)                           | 2440.0                                                                                                                                                  |
| Crystal size                      | 0.18×0.16×0.14 mm <sup>3</sup>                                                                                                                          |
| Theta range for data collection   | 2.999 to 68.217 deg                                                                                                                                     |
| Limiting indices                  | -29≤h≤28, -17≤k≤17, -18≤l≤18                                                                                                                            |
| Reflections collected / unique    | 58493/10368 [R(int) = 0.0670]                                                                                                                           |
| Completeness to theta = 67.679    | 100.0%                                                                                                                                                  |
| Absorption correction             | Semi-empirical from equivalents                                                                                                                         |
| Max and min. transmission         | 0.7631 and 0.6359                                                                                                                                       |
| Refinement method                 | Full-matrix least-squares on F <sup>2</sup>                                                                                                             |
| Data / restraints / parameters    | 10368/2/769                                                                                                                                             |
| Goodness-of-fit on F <sup>2</sup> | 1.038                                                                                                                                                   |
| Final R indices [I > 2 sigma (I)] | R1 = 0.0519, wR2 = 0.1404                                                                                                                               |
| R indices (all data)              | R1 = 0.0605, wR2 = 0.1490                                                                                                                               |
| Extinction coefficient            | n/a                                                                                                                                                     |
| Largest diff. peak and hole       | 1.067 and -0.665 e.Å <sup>-3</sup>                                                                                                                      |



## 7. NMR and MALDI-TOF MS Spectra of Precursors and Cage DA-2

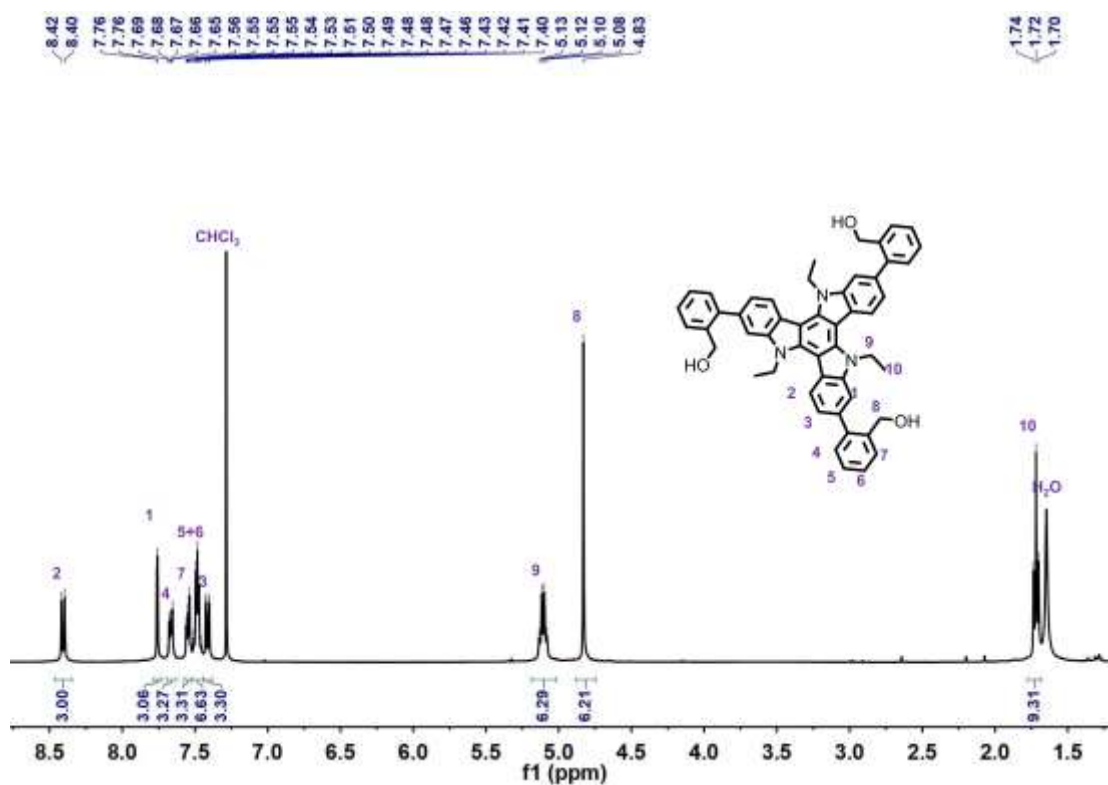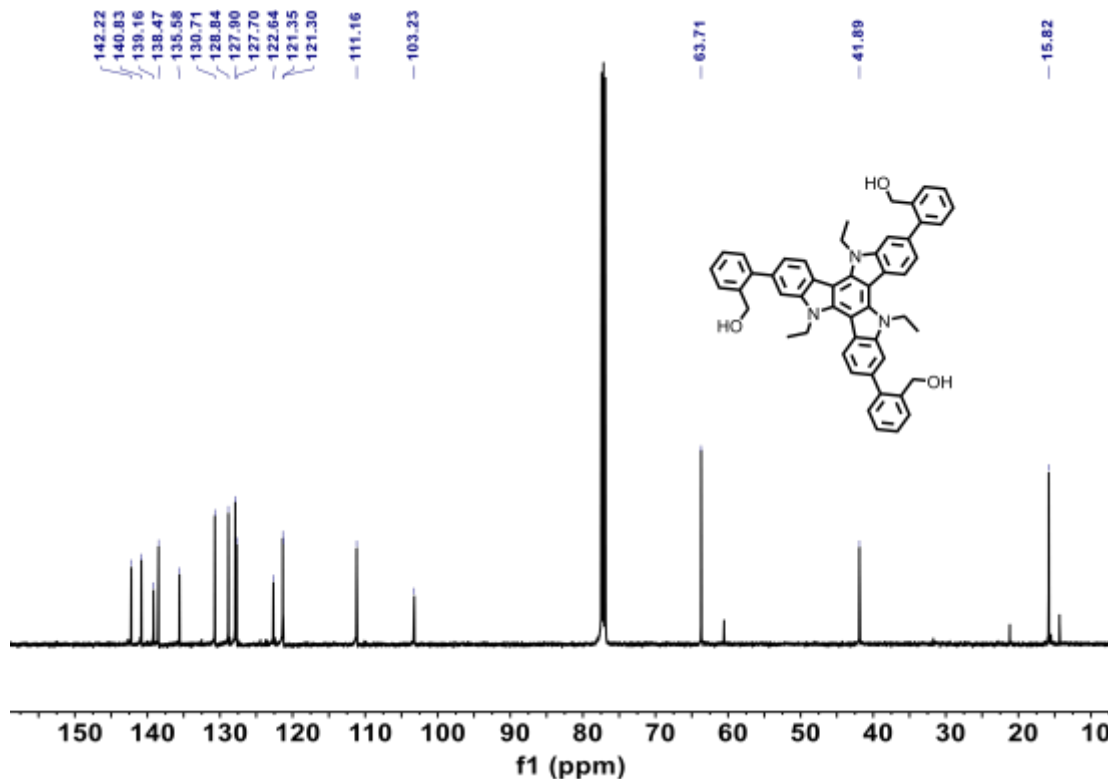

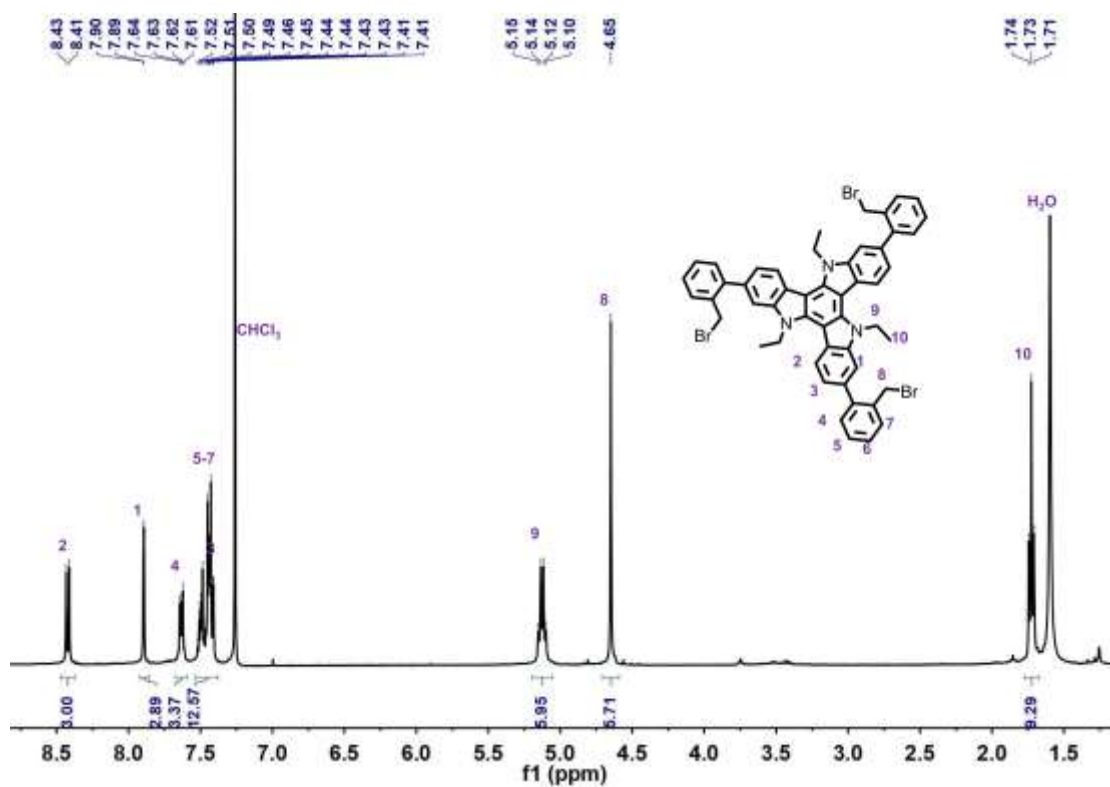

Fig. S24  $^1\text{H}$  NMR spectrum of compound 3 in  $\text{CDCl}_3$  (400 MHz, 298 K).

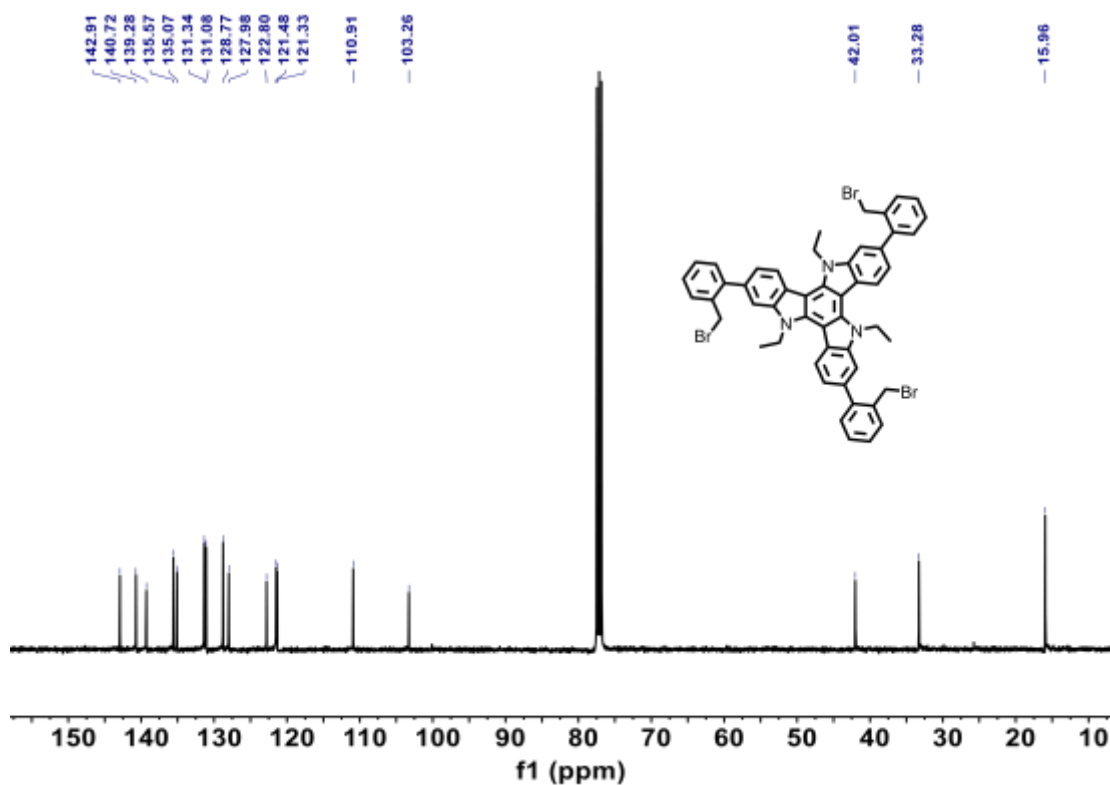

Fig. S25  $^{13}\text{C}$  NMR spectrum of compound 3 in  $\text{CDCl}_3$  (125 MHz, 298 K).

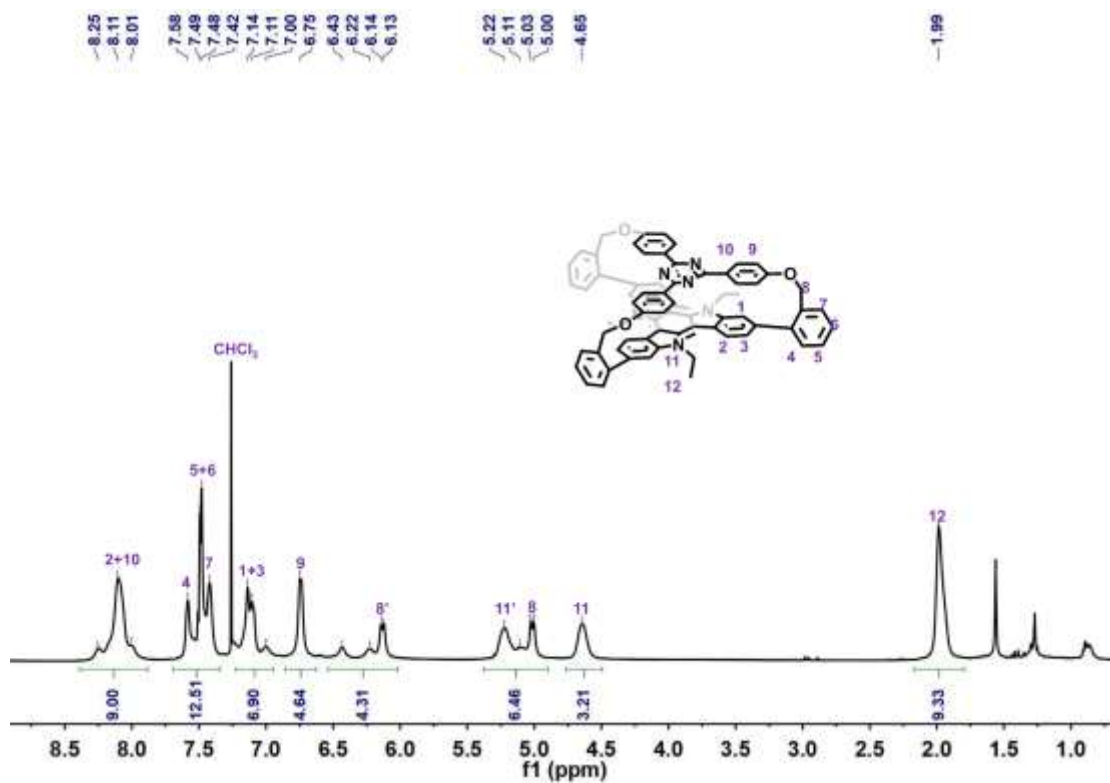

Fig. S26 <sup>1</sup>H NMR spectrum of compound DA-2 in CDCl<sub>3</sub> (400 MHz, 298 K).

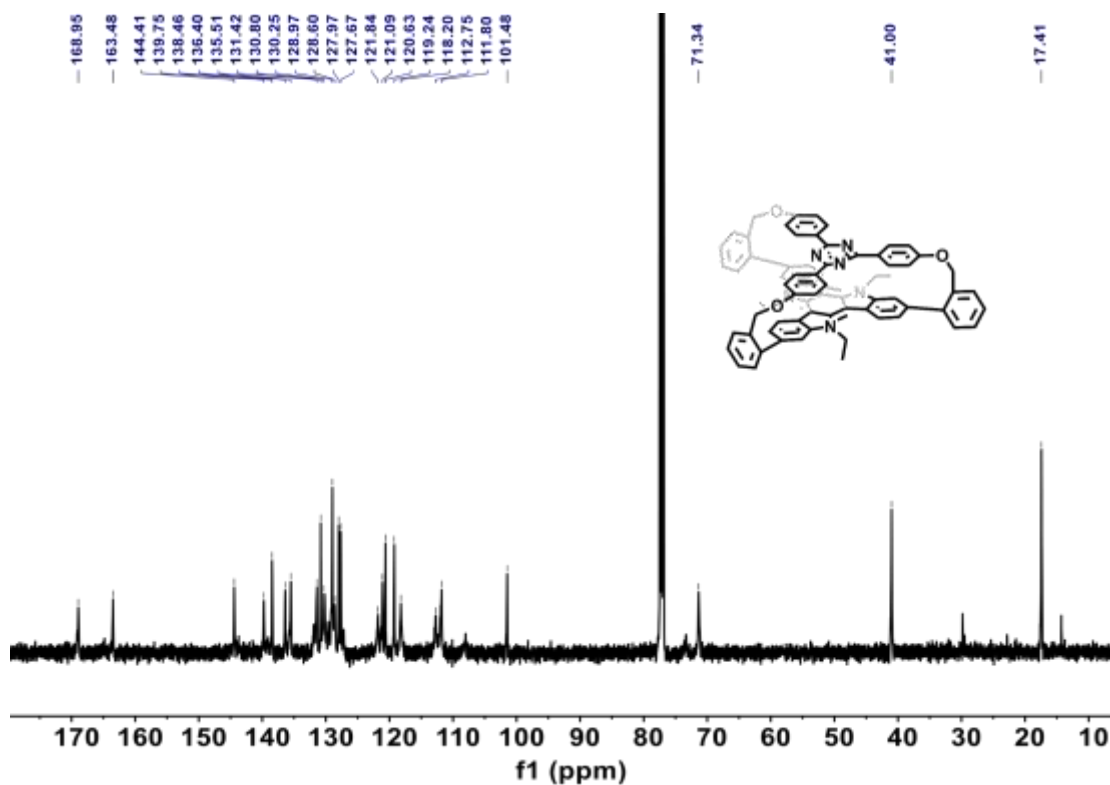

Fig. S27 <sup>13</sup>C NMR spectrum of compound DA-2 in CDCl<sub>3</sub> (125 MHz, 298 K).

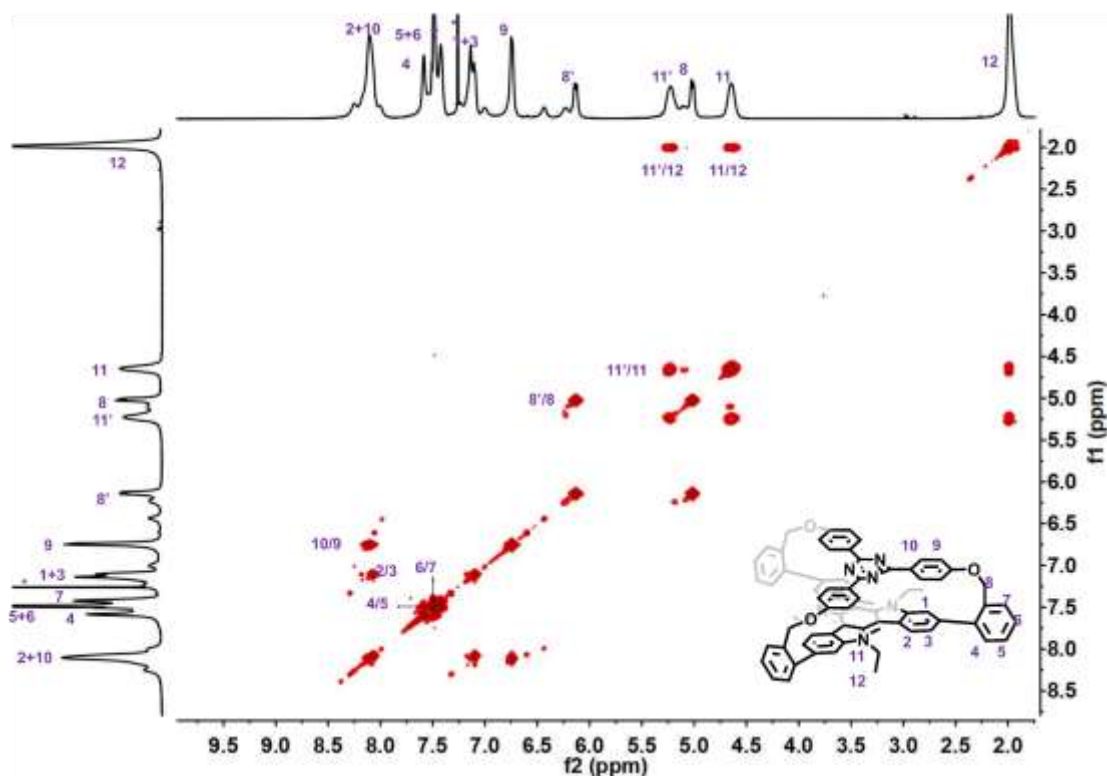

**Fig. S28**  $^1\text{H}$ - $^1\text{H}$  COSY spectrum of compound **DA-2** in  $\text{CDCl}_3$  (400 MHz, 298 K).

The racemic compound and two enantiomers have the same  $^1\text{H}$  NMR spectrum, and we think the small peaks in Figure S17 were signals from different rotational conformers with unequal populations of the sample instead of from impurities. The rotational conformers can originate from the rotation of phenyl linker and ethyl group which influences the chemical shift. To prove this, we changed the deuterated solvent from  $\text{CDCl}_3$  to  $\text{C}_2\text{D}_2\text{Cl}_4$  and conducted following additional NMR experiments which have been added as Fig S29–S35. NOESY spectrum of the sample in Fig S30 indicates the distances between protons on the acceptor, donor and benzyl group are close enough to influence the chemical shift of each other. In variable temperature  $^1\text{H}$  NMR from 228 K to 338 K in  $\text{C}_2\text{D}_2\text{Cl}_4$  (Fig. S29), at lower temperature, both the main peak and side peaks assigned to proton 2 and 10 shows more splitting which can be attributed to the lower exchange rate between different conformers at lower temperature. With temperature increases, the exchange rate increases which leads to the broadening and merging of peaks from different conformers. At a higher temperature of 373 K (Fig S33), the peaks split clearer which can be well assigned together with the COSY spectra at 373 K. Additionally, DOSY NMR of the sample in ESI Fig S33 also displays that only one dominant species of **DA-2** with the residue of solvents.

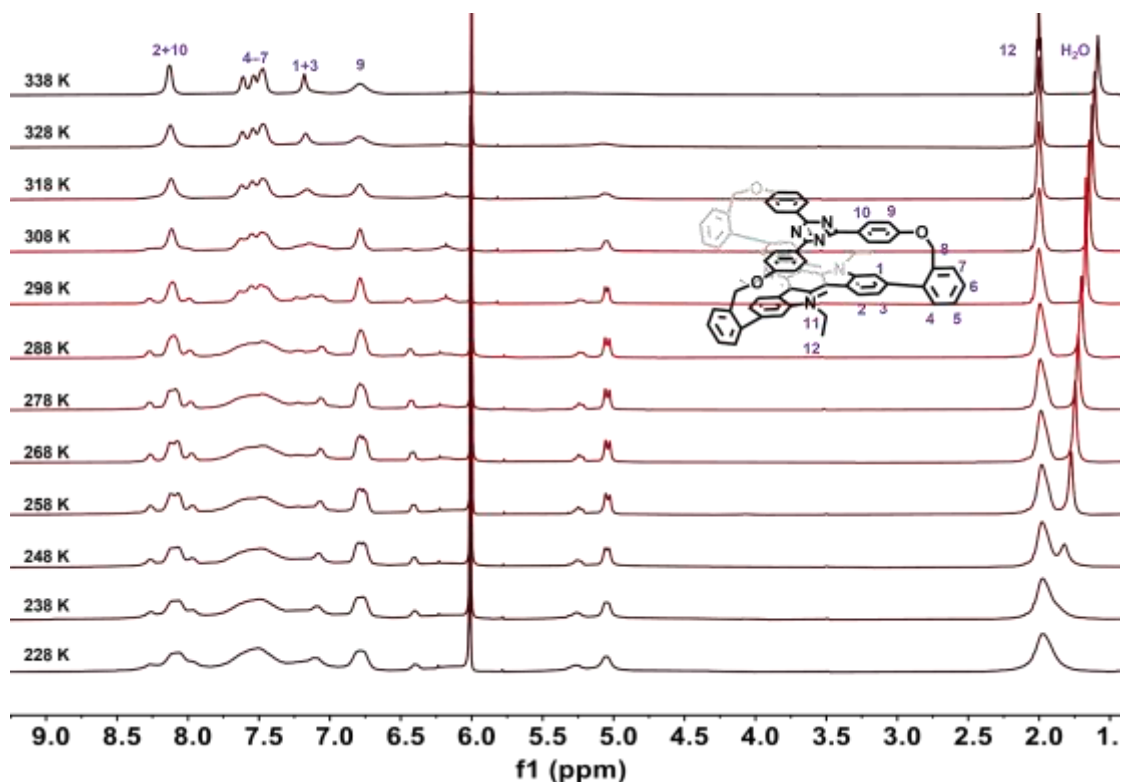

**Fig. S29** Variable temperature  $^1\text{H}$  NMR spectra of compound DA-2 in  $\text{C}_2\text{D}_2\text{Cl}_4$  (500 MHz). At higher temperature, signals are broadened and merged. This can be attributed to the chemical exchange between different conformers resulted from the rotation of ethyl and benzyl groups. The exchange rate is increased at higher temperature which leads to the averaging of signals from different conformers and thus the broadening and merging of peaks.<sup>S11,S12</sup>

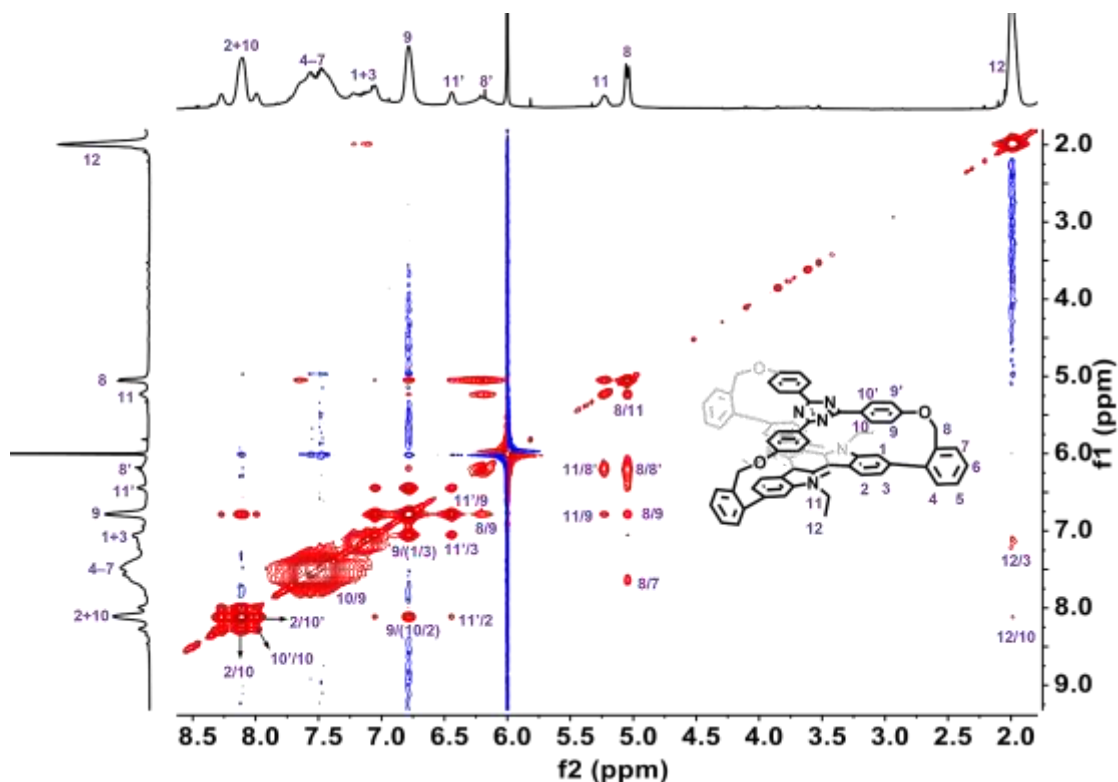

**Fig. S30**  $^1\text{H}$ - $^1\text{H}$  NOESY NMR spectrum of compound DA-2 in  $\text{C}_2\text{D}_2\text{Cl}_4$  (500 MHz, 298 K).

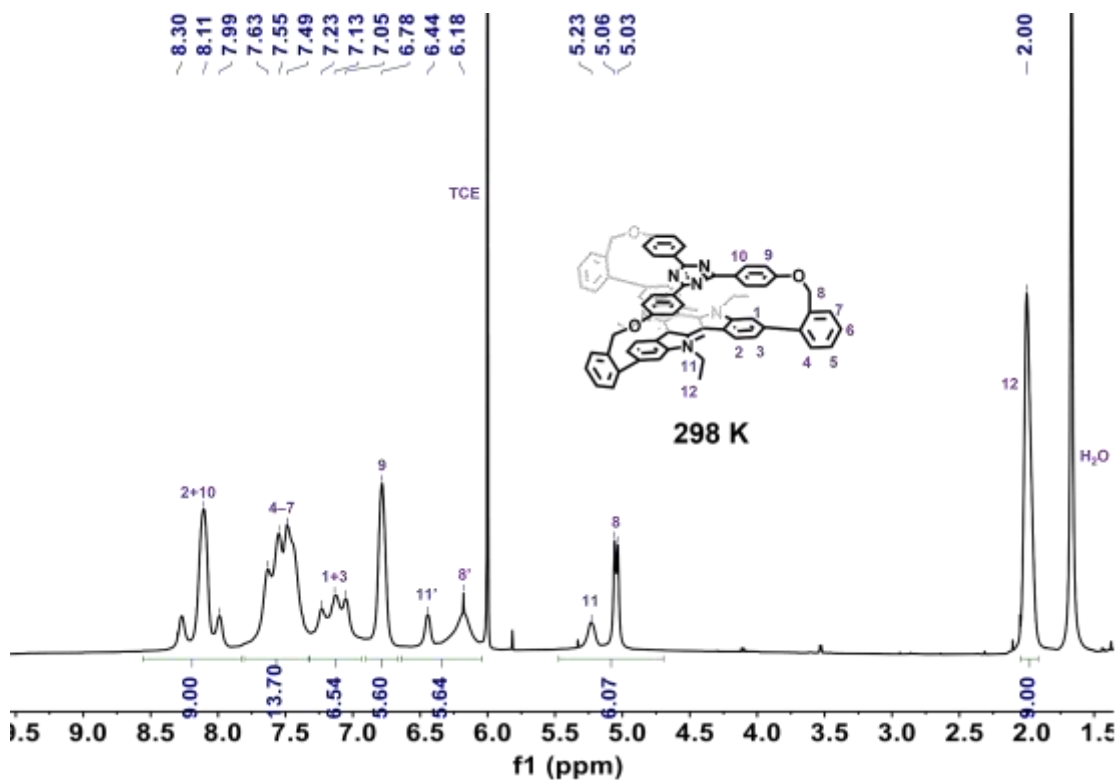

Fig. S31 <sup>1</sup>H NMR spectrum of compound DA-2 in C<sub>2</sub>D<sub>2</sub>Cl<sub>4</sub> (500 MHz, 298 K).

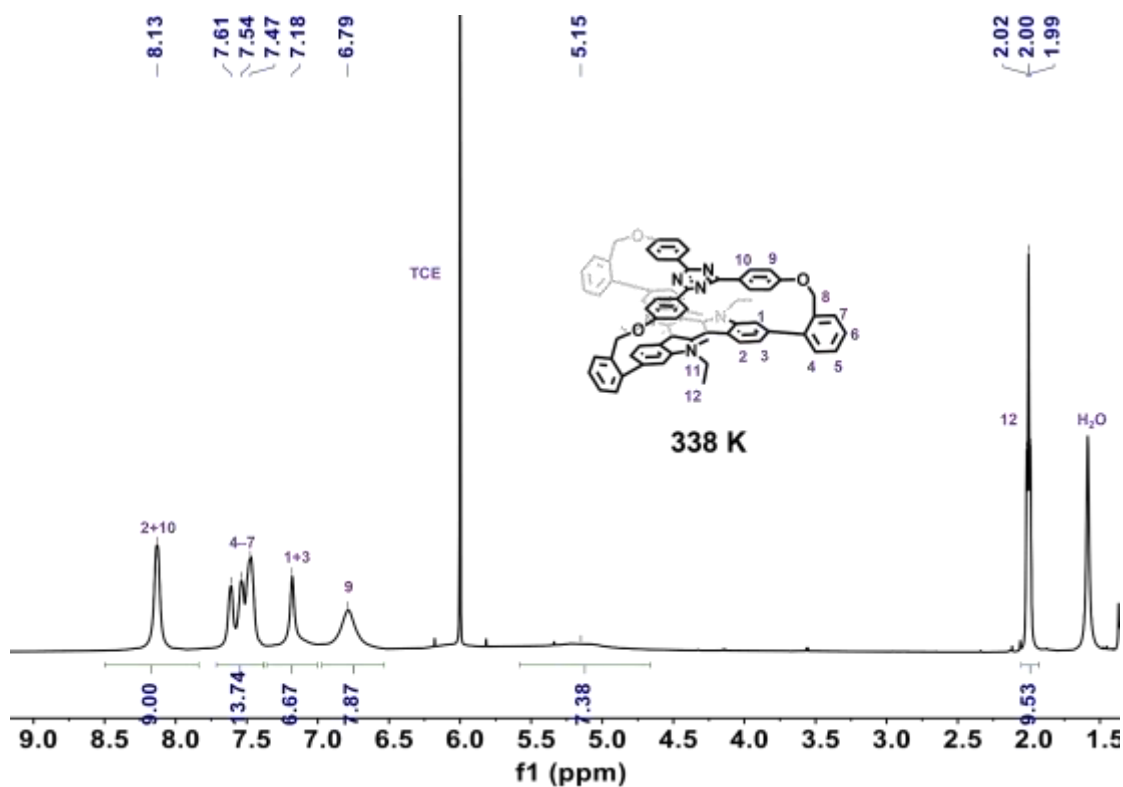

Fig. S32 <sup>1</sup>H NMR spectrum of compound DA-2 in C<sub>2</sub>D<sub>2</sub>Cl<sub>4</sub> (500 MHz, 338 K). The broad flat peak at 5.15 ppm is assigned to proton 8 and 11 and the integrate is smaller because of the peak broadening and overlapping with solvent peaks.

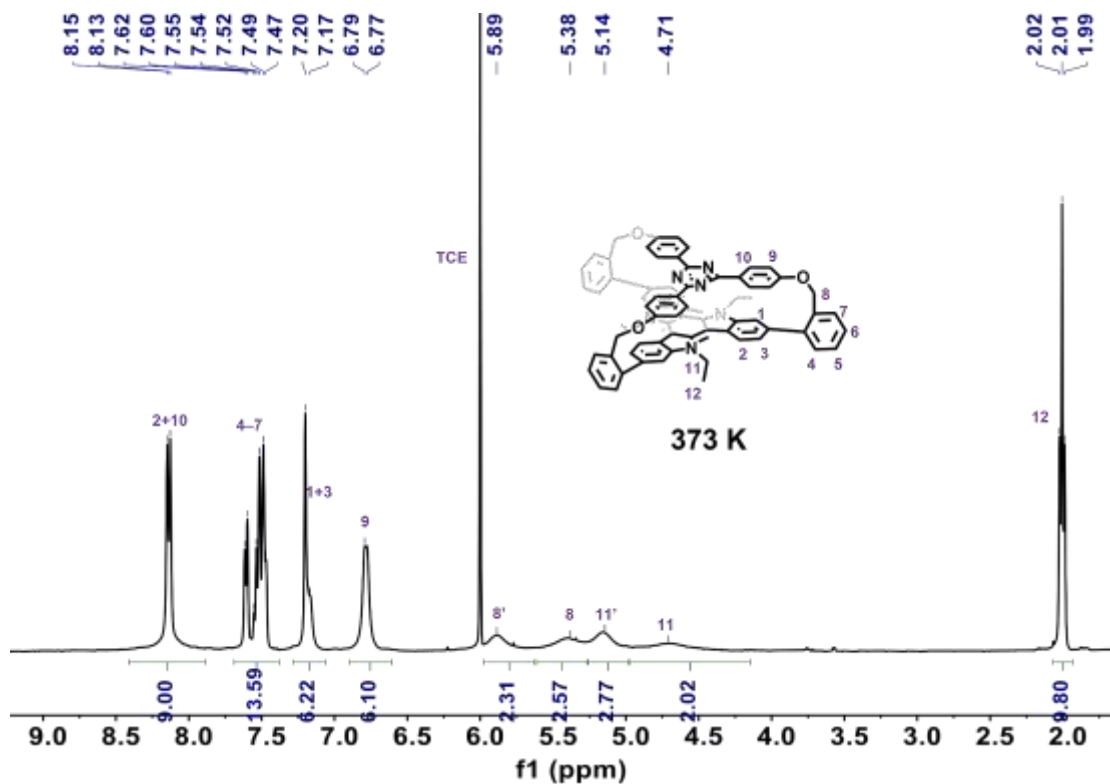

Fig. S33  $^1\text{H}$  NMR spectrum of compound DA-2 in  $\text{C}_2\text{D}_2\text{Cl}_4$  (400 MHz, 373 K).

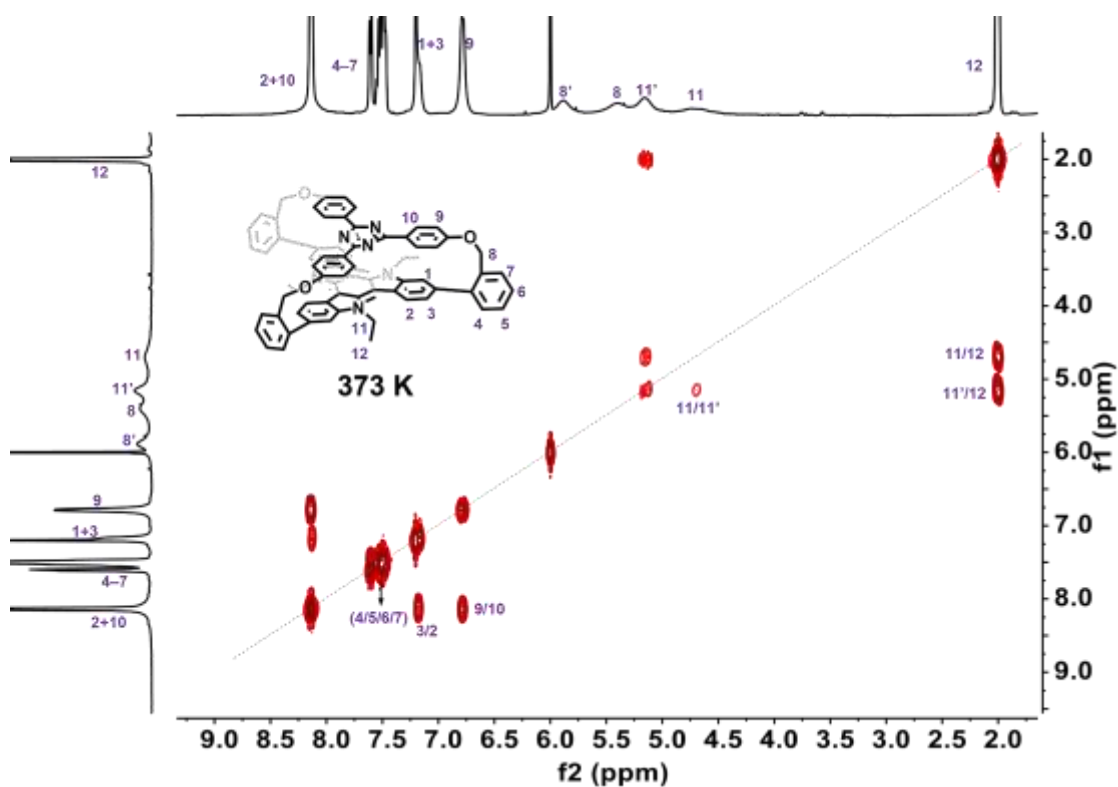

Fig. S34  $^1\text{H}$ - $^1\text{H}$  COSY NMR spectrum of compound DA-2 in  $\text{C}_2\text{D}_2\text{Cl}_4$  (400 MHz, 373 K).

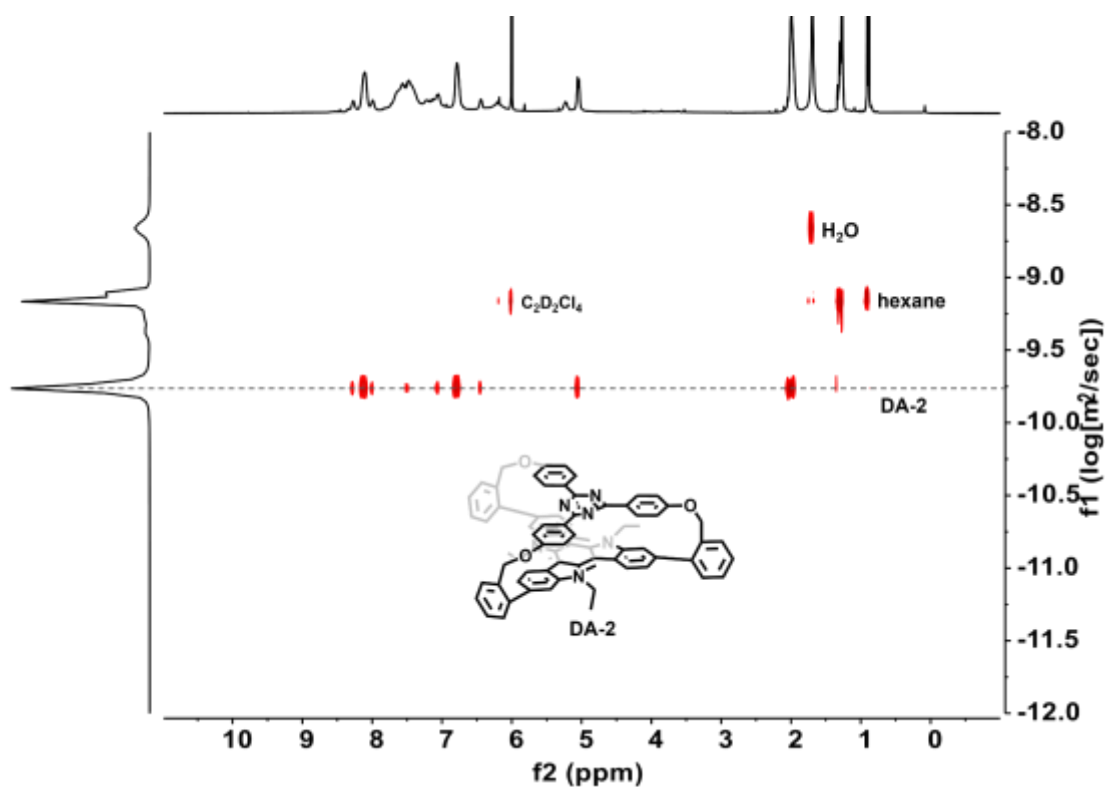

Fig. S35 DOSY NMR spectrum of compound **DA-2** in  $C_2D_2Cl_4$  (500 MHz, 298 K).

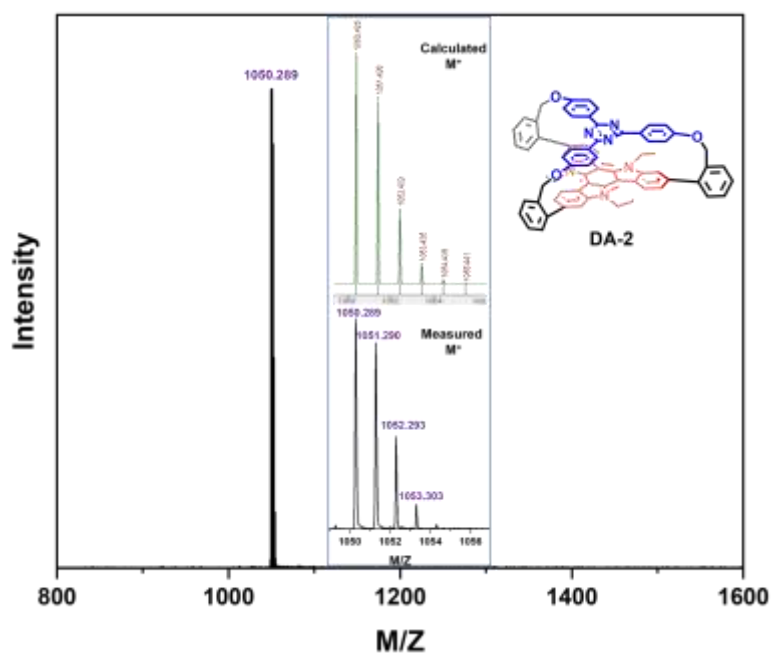

Fig. S36 MALDI-TOF MS spectrum of cage **DA-2**, and the inset are the calculated and experimental isotopic distributions of the cage.

## 8. References

[S1] L. Ji, Q. Fang, M. Yuan, Z. Liu, Y. Shen and H. Chen, *Org. Lett.*, **2010**, *12*, 5192.



- [S2] R.-F Zhang, W.-J. Hu, Y. A. Liu, X.-L. Zhao, J.-S. Li, B. Jiang and K. Wen, *J. Org. Chem.*, **2016**, *81*, 5649.
- [S3] Gaussian 09, Revision A.02, M. J. Frisch, G. W. Trucks, H. B. Schlegel, G. E. Scuseria, M. A. Robb, J. R. Cheeseman, G. Scalmani, V. Barone, B. Mennucci, G. A. Petersson, H. Nakatsuji, M. Caricato, X. Li, H. P. Hratchian, A. F. Izmaylov, J. Bloino, G. Zheng, J. L. Sonnenberg, M. Hada, M. Ehara, K. Toyota, R. Fukuda, J. Hasegawa, M. Ishida, T. Nakajima, Y. Honda, O. Kitao, H. Nakai, T. Vreven, J. A. Montgomery, Jr., J. E. Peralta, F. Ogliaro, M. Bearpark, J. J. Heyd, E. Brothers, K. N. Kudin, V. N. Staroverov, R. Kobayashi, J. Normand, K. Raghavachari, A. Rendell, J. C. Burant, S. S. Iyengar, J. Tomasi, M. Cossi, N. Rega, J. M. Millam, M. Klene, J. E. Knox, J. B. Cross, V. Bakken, C. Adamo, J. Jaramillo, R. Gomperts, R. E. Stratmann, O. Yazyev, A. J. Austin, R. Cammi, C. Pomelli, J. W. Ochterski, R. L. Martin, K. Morokuma, V. G. Zakrzewski, G. A. Voth, P. Salvador, J. J. Dannenberg, S. Dapprich, A. D. Daniels, O. Farkas, J. B. Foresman, J. V. Ortiz, J. Cioslowski, and D. J. Fox, Gaussian, Inc., Wallingford CT, 2016.
- [S4] J. D. Chai and L. Head-Gordon, *Phys. Chem. Chem. Phys.*, **2008**, *10*, 6615–6620.
- [S5] (a) P. C. Hariharan and J. A. Pople, *Theor. Chim. Acta*, **1973**, *28*, 213–222. (b) W. J. Hehre, R. Ditchfield and J. A. Pople, *J. Chem. Phys.*, **1972**, *56*, 2257–2261. (c) R. Ditchfield, W. J. Hehre and J. A. Pople, *J. Chem. Phys.*, **1971**, *54*, 724–728.
- [S6] (a) M. Cossi, N. Rega, G. Scalmani and V. Barone, *J. Comput. Chem.*, **2003**, *24*, 669–681. (b) V. Barone and M. Cossi, *J. Phys. Chem. A*, **1998**, *102*, 1995–2001.
- [S7] R. Krishnan, J. S. Binkley, R. Seeger and J. A. Pople, *J. Chem. Phys.*, **1980**, *72*, 650–654.
- [S8] S. Grimme, S. Ehrlich and L. Goerigk, *J. Comp. Chem.*, **2011**, *32*, 1456–65.
- [S9] T. Yanai, D. P. Tew and N. C. Handy, *Chem. Phys. Lett.*, **2004**, *393*, 51–57.
- [S10] T. Lu and F. Chen, *J. Comput. Chem.*, **2012**, *33*, 580–592.
- [S11] C. A. Waudby and I. Alfonso, *J. Magn. Reson. Open*, **2023**, *16–17*, 100102.
- [S12] A. D. Bain, *Prog. Nucl. Magn. Reson. Spectrosc.*, **2003**, *43*, 63–103.

## 9. Optimized Geometry of DA-2

|   |             |             |             |
|---|-------------|-------------|-------------|
| O | -4.49096105 | -5.17944382 | 1.63754720  |
| N | 0.46790184  | -1.28138844 | 2.49732139  |
| C | -0.83924213 | -1.00211572 | 2.48986910  |
| C | -2.31723990 | 2.84339797  | 2.19317469  |
| H | -3.00181910 | 2.00292649  | 2.19337062  |
| C | -2.79436883 | 4.12423686  | 1.96386318  |
| H | -3.85400665 | 4.27410687  | 1.79704673  |
| C | -1.89845135 | 5.19498844  | 1.92303353  |
| C | -0.54701285 | 4.97998973  | 2.21664725  |
| H | 0.12809075  | 5.82869785  | 2.20803529  |
| C | -0.08389704 | 3.69743626  | 2.44822593  |
| H | 0.96999473  | 3.52106693  | 2.63115051  |
| C | -3.33951068 | 6.73064442  | 0.74032480  |
| H | -4.04196068 | 7.38599531  | 1.26131869  |
| H | -3.85725531 | 5.80496473  | 0.48851704  |
| C | -2.81901658 | 7.40445423  | -0.50724203 |
| C | -2.99032043 | 8.77970584  | -0.66249993 |
| H | -3.52585661 | 9.33526190  | 0.10260001  |
| C | -2.48067481 | 9.44986052  | -1.77099699 |
| H | -2.62650647 | 10.52017509 | -1.87370522 |
| C | -1.77888832 | 8.73874112  | -2.73754211 |
| H | -1.37191888 | 9.24813838  | -3.60517823 |
| C | -1.60197351 | 7.36529491  | -2.59334288 |
| H | -1.06142191 | 6.80513500  | -3.35041769 |
| C | -2.11981694 | 6.68054515  | -1.49162463 |
| C | -1.89837900 | 5.20821960  | -1.38307828 |
| C | -0.61470019 | 4.72124155  | -1.16163681 |
| H | 0.22140620  | 5.40656319  | -1.06933879 |
| C | -0.43264387 | 3.34444336  | -1.06510601 |
| C | -1.49897004 | 2.42273049  | -1.14942312 |
| C | -2.77176632 | 2.93204672  | -1.43387272 |
| H | -3.61671246 | 2.27713557  | -1.59562958 |
| C | -2.96144895 | 4.30259342  | -1.54051406 |
| H | -3.95189691 | 4.68617855  | -1.76705941 |
| C | -0.90074125 | 1.10559636  | -0.99063096 |
| C | 0.49653678  | 1.30533453  | -0.93972606 |
| C | 1.41341919  | 0.22902889  | -0.98927144 |
| C | 0.88754967  | -1.08109514 | -0.93884223 |
| C | -0.50304096 | -1.33727898 | -0.98970010 |
| C | -1.37450004 | -0.22671766 | -0.94033824 |
| C | -1.34475195 | -2.51406486 | -1.14789054 |
| C | -1.15014480 | -3.87140507 | -1.43075872 |
| H | -0.16048724 | -4.27673122 | -1.59028015 |
| C | -2.24288564 | -4.72009833 | -1.53859689 |
| H | -2.08024204 | -5.76999405 | -1.76387805 |
| C | -3.55860090 | -4.25123835 | -1.38331439 |
| C | -3.77776126 | -2.89582340 | -1.16272640 |
| H | -4.78898245 | -2.51317969 | -1.07178926 |
| C | -2.67590121 | -2.05080721 | -1.06539511 |
| C | -4.72452371 | -5.17702992 | -1.49393960 |
| C | -5.57173596 | -5.07102714 | -2.59936469 |
| H | -5.35112097 | -4.32580829 | -3.35776287 |
| C | -6.67550532 | -5.90691532 | -2.74536596 |
| H | -7.31628818 | -5.80921545 | -3.61585377 |
| C | -6.94839984 | -6.86585290 | -1.77667080 |
| H | -7.80482812 | -7.52402177 | -1.88053713 |

|   |             |             |             |
|---|-------------|-------------|-------------|
| C | -6.11798675 | -6.97201294 | -0.66463317 |
| H | -6.33743908 | -7.71022891 | 0.10200771  |
| C | -4.17128189 | -6.25410659 | 0.74357774  |
| H | -4.39403586 | -7.18742792 | 1.26665323  |
| H | -3.10986392 | -6.24600398 | 0.49568239  |
| C | 3.11825299  | -1.29573761 | -1.06268718 |
| C | 2.85327265  | 0.08857471  | -1.14780029 |
| C | 3.93063757  | 0.93590180  | -1.43324035 |
| H | 3.78593432  | 1.99502744  | -1.59568931 |
| C | 5.21228096  | 0.41454107  | -1.54032442 |
| H | 6.03964768  | 1.08029791  | -1.76768899 |
| C | 5.46511374  | -0.95880693 | -1.38173618 |
| C | 4.40160664  | -1.82667746 | -1.15917640 |
| H | 4.57708126  | -2.89335735 | -1.06624208 |
| C | 6.85116538  | -1.50288842 | -1.48923185 |
| C | 7.82564130  | -1.26153773 | -0.50222843 |
| C | 9.10287759  | -1.79938236 | -0.65650517 |
| H | 9.85008931  | -1.61499508 | 0.11062786  |
| C | 9.43129365  | -2.57220467 | -1.76668861 |
| H | 10.43170227 | -2.97987535 | -1.86869822 |
| C | 8.46654814  | -2.82256679 | -2.73565605 |
| H | 8.70641305  | -3.42700657 | -3.60458290 |
| C | 7.18787623  | -2.29062710 | -2.59230474 |
| H | 6.43408409  | -2.47723910 | -3.35137203 |
| C | 7.49856745  | -0.47851930 | 0.74718853  |
| H | 8.41549418  | -0.20072305 | 1.27303045  |
| H | 6.95791561  | 0.43414505  | 0.49657455  |
| C | 5.44396342  | -0.96011681 | 1.92182799  |
| C | 4.58067627  | -2.02193884 | 2.21535798  |
| H | 4.97708339  | -3.03136318 | 2.20775004  |
| C | 3.23869594  | -1.78020440 | 2.44630918  |
| H | 2.55771542  | -2.60366957 | 2.62925792  |
| C | 2.73251169  | -0.47659171 | 2.40126268  |
| C | 3.61809390  | 0.58032256  | 2.18854753  |
| H | 3.23341002  | 1.59374128  | 2.18661948  |
| C | 4.96579989  | 0.35164124  | 1.96036319  |
| H | 5.62630334  | 1.19343152  | 1.79211102  |
| C | -3.83805293 | 0.03955459  | -0.42080237 |
| H | -4.38857860 | -0.60756731 | 0.26562813  |
| H | -4.50999288 | 0.34395189  | -1.22919827 |
| C | 1.95888139  | 3.30370181  | -0.41711786 |
| H | 2.54893029  | 2.57937586  | 0.14227837  |
| H | 1.67420385  | 4.10501940  | 0.26828975  |
| C | 1.88653201  | -3.34693707 | -0.41657668 |
| H | 0.96480114  | -3.49563464 | 0.14386571  |
| H | 2.72354403  | -3.50274517 | 0.26784657  |
| C | -5.00961397 | -6.14033989 | -0.50767800 |
| O | 6.72739469  | -1.29502338 | 1.63857964  |
| N | 0.87148430  | 1.04763366  | 2.49549201  |
| C | -0.45187691 | 1.22505898  | 2.48889934  |
| O | -2.25180304 | 6.47325199  | 1.63844041  |
| N | -1.34729170 | 0.23271826  | 2.49832321  |
| C | 1.28325019  | -0.22405553 | 2.48747041  |
| N | -2.68143490 | -0.67831758 | -0.91416253 |
| C | -1.78294860 | -2.13078096 | 2.40371702  |
| N | 0.75882204  | 2.66291736  | -0.91280575 |
| C | -1.31129572 | -3.42687615 | 2.19314171  |
| H | -0.24161024 | -3.60202701 | 2.19406166  |

|   |             |             |             |
|---|-------------|-------------|-------------|
| N | 1.93232787  | -1.98656092 | -0.91027551 |
| C | -2.18399857 | -4.47887846 | 1.96406931  |
| H | -1.78547594 | -5.47224572 | 1.79841211  |
| C | -3.55883853 | -4.23591208 | 1.92187494  |
| C | -4.04604757 | -2.95679459 | 2.21372467  |
| H | -5.11824815 | -2.79413367 | 2.20379238  |
| C | -3.16486175 | -1.91617047 | 2.44551369  |
| H | -3.53666251 | -0.91399567 | 2.62651431  |
| C | -0.95862578 | 2.60630430  | 2.40420171  |
| H | 2.56157653  | 3.73151788  | -1.22421051 |
| H | 1.95388602  | -4.08168656 | -1.22476427 |
| H | -3.50861355 | 0.91474805  | 0.13672654  |
